# Supplementary material for: Ferulic and p-coumaric acid derivatives as dual EGFR-VEGFR2 inhibitors: design, semi-synthesis, and biological investigations
Source: Royal Society of Chemistry journal article supplement (doi:10.1039/d6ra01213b), 2026-04-14

## Supplementary Information

# Ferulic and *p*-Coumaric Acid Derivatives as Dual EGFR-VEGFR2 Inhibitors: Design, Semi-Synthesis and Biological Investigations

Ranza Elrayess <sup>a, b\*†</sup>, Mohamed S. Nafie <sup>c, d†</sup>, Safwat A. Ahmed <sup>e</sup>, Yosra K. Alkazzaz <sup>f</sup>, Khaled M. Darwish <sup>g, h</sup>, Heba N. Gad EL-Hak <sup>i</sup>, Enas E. Eltamany <sup>e\*</sup>.

<sup>a</sup> *Pharmaceutical Organic Chemistry Department, Faculty of Pharmacy, Suez Canal University, Ismailia 41522, Egypt*

<sup>b</sup> *Pharmaceutical Organic Chemistry Department, College of Pharmacy, Al-Ayen Iraqi University, An Nasiriyah, 64001, Iraq*

<sup>c</sup> *Department of Chemistry, College of Sciences, University of Sharjah, Sharjah, 27272, United Arab Emirates.*

<sup>d</sup> *Department of Chemistry, Faculty of Science, Suez Canal University, Ismailia 41522, Egypt*

<sup>e</sup> *Pharmacognosy Department, Faculty of Pharmacy, Suez Canal University, Ismailia 41522, Egypt*

<sup>f</sup> *Institute of Biotechnology for Postgraduate Studies and Research, Suez Canal University, Ismailia, 41522, Egypt*

<sup>g</sup> *Department of Medicinal Chemistry, Faculty of Pharmacy, Suez Canal University, Ismailia, Egypt*

<sup>h</sup> *Department of Medicinal Chemistry, Faculty of Pharmacy, Galala University, New Galala 43713, Egypt.*

<sup>i</sup> *Department of Zoology, Faculty of Science, Suez Canal University, Ismailia 41522, Egypt*

† Ranza Elrayess and Mohamed S. Nafie contributed equally to this study

### \*Corresponding authors:

**Ranza Elrayess:** Pharmaceutical Organic Chemistry Department, Faculty of Pharmacy, Suez Canal University, Ismailia 41522, Egypt; Email: [Ranza.el-rayes@pharm.suez.edu.eg](mailto:Ranza.el-rayes@pharm.suez.edu.eg)

**Enas E. Eltamany:** Pharmacognosy Department, Faculty of science, Suez Canal University, Ismailia 41522, Egypt; Email: [enas\\_mostafa@pharm.suez.edu.eg](mailto:enas_mostafa@pharm.suez.edu.eg)

## Supplementary Information

### Table of contents

| Title                                                                                                          | Page        |
|----------------------------------------------------------------------------------------------------------------|-------------|
| <b>Material and methods, chemistry</b>                                                                         | <b>3-5</b>  |
| <b>Instrument and reagent used</b>                                                                             | <b>3</b>    |
| <b>Synthetic procedure of compounds 1 a-b</b>                                                                  | <b>4</b>    |
| <b>Synthetic procedure of compounds 2 a-b and 3a-h</b>                                                         | <b>5</b>    |
| <b>Material and methods, <i>In vivo</i> studies</b>                                                            | <b>6-7</b>  |
| <b>Animals and tumor cell lines</b>                                                                            | <b>6</b>    |
| <b>Antitumor potentiality</b>                                                                                  | <b>6</b>    |
| <b>Histological examinations</b>                                                                               | <b>7</b>    |
| <b>Immunohistochemical preparation</b>                                                                         | <b>7</b>    |
| <b>References</b>                                                                                              | <b>7</b>    |
| <b><sup>1</sup>H NMR and <sup>13</sup>C NMR spectral data of the synthesized compounds 1a-b, 2a-b and 3a-h</b> | <b>8-27</b> |
| <b>Fig. S1. <sup>1</sup>H-NMR of compound 1a</b>                                                               | <b>8</b>    |
| <b>Fig. S2. <sup>1</sup>H-NMR of compound 1b</b>                                                               | <b>9</b>    |
| <b>Fig. S3. <sup>1</sup>H-NMR of compound 2a</b>                                                               | <b>10</b>   |
| <b>Fig. S4. <sup>1</sup>H-NMR of compound 2b</b>                                                               | <b>11</b>   |
| <b>Fig. S5. <sup>1</sup>H-NMR of compound 3a</b>                                                               | <b>12</b>   |
| <b>Fig. S6. <sup>13</sup>C-NMR of compound 3a</b>                                                              | <b>13</b>   |
| <b>Fig. S7. <sup>1</sup>H-NMR of compound 3b</b>                                                               | <b>14</b>   |
| <b>Fig. S8. <sup>13</sup>C-NMR of compound 3b</b>                                                              | <b>15</b>   |
| <b>Fig. S9. <sup>1</sup>H-NMR of compound 3c</b>                                                               | <b>16</b>   |
| <b>Fig. S10. <sup>13</sup>C-NMR of compound 3c</b>                                                             | <b>17</b>   |
| <b>Fig. S11. <sup>1</sup>H-NMR of compound 3d</b>                                                              | <b>18</b>   |
| <b>Fig. S12. <sup>13</sup>C-NMR of compound 3d</b>                                                             | <b>19</b>   |
| <b>Fig. S13. <sup>1</sup>H-NMR of compound 3e</b>                                                              | <b>20</b>   |
| <b>Fig. S14. <sup>13</sup>C-NMR of compound 3e</b>                                                             | <b>21</b>   |
| <b>Fig. S15. <sup>1</sup>H-NMR of compound 3f</b>                                                              | <b>22</b>   |

## Supplementary Information

|                                                                                                              |              |
|--------------------------------------------------------------------------------------------------------------|--------------|
| <b>Fig. S16.</b> $^{13}\text{C}$ -NMR of compound 3f                                                         | <b>23</b>    |
| <b>Fig. S17.</b> $^1\text{H}$ -NMR of compound 3g                                                            | <b>24</b>    |
| <b>Fig. S18.</b> $^{13}\text{C}$ -NMR of compound 3g                                                         | <b>25</b>    |
| <b>Fig. S19.</b> $^1\text{H}$ -NMR of compound 3h                                                            | <b>26</b>    |
| <b>Fig. S20.</b> $^{13}\text{C}$ -NMR of compound 3h                                                         | <b>27</b>    |
| <b>Fig.S21 Elemental analysis of compounds 1a-b, 2a-b and 3a-h</b>                                           | <b>28</b>    |
| <b>Mass spectral data of the compounds 1a-b, 2a-b and 3a-h</b>                                               | <b>29-39</b> |
| <b>Fig. S22.</b> Mass spectrum of compound 1a                                                                | <b>29</b>    |
| <b>Fig. S23.</b> Mass spectrum of compound 1b                                                                | <b>30</b>    |
| <b>Fig. S24.</b> Mass spectrum of compound 2a                                                                | <b>31</b>    |
| <b>Fig. S25.</b> Mass spectrum of compound 2b                                                                | <b>32</b>    |
| <b>Fig. S26.</b> Mass spectrum of compound 3a                                                                | <b>33</b>    |
| <b>Fig. S27.</b> Mass spectrum of compound 3b                                                                | <b>34</b>    |
| <b>Fig. S28.</b> Mass spectrum of compound 3c                                                                | <b>35</b>    |
| <b>Fig. S29.</b> Mass spectrum of compound 3d                                                                | <b>36</b>    |
| <b>Fig. S30.</b> Mass spectrum of compound 3e                                                                | <b>37</b>    |
| <b>Fig. S31.</b> Mass spectrum of compound 3f                                                                | <b>38</b>    |
| <b>Fig. S32.</b> Mass spectrum of compound 3h                                                                | <b>39</b>    |
| <b>Fig. S33.</b> $\text{IC}_{50}$ curves (for MCF-7, HepG2 and A594) of the compounds <b>2a-b &amp; 3a-h</b> | <b>40-41</b> |

### 3. Material and methods

#### 3.1 chemistry

##### 3.1.1. Instrument

On a Stuart melting point apparatus (SMP10), the uncorrected melting points of all materials were measured. On Pye-Unicam SP-3-300 infrared spectrophotometer (KBr disks), the IR spectra were captured and expressed in wave number ( $\text{cm}^{-1}$ ). On a Bruker Avance III NMR spectrometer, 400 MHz,  $^1\text{H}$ -NMR spectra were run. At the School of Pharmacy, Ain Shams University, the  $^{13}\text{C}$ -NMR spectra ( $\delta$ , ppm) were conducted at 100 MHz and 125 MHz on a BRUKER NMR spectrometer (BRUKER, Manufacturing & Engineering Inc., Anaheim, CA, USA). TMS was utilized in deuterated dimethyl sulfoxide as an internal standard (DMSO- $d_6$ ). Ppm is used to quote

## Supplementary Information

chemical shifts ( $\delta$ ). These acronyms are used: s for singlet; d for doublet; and m for multiplet. All values for the coupling constant ( $J$ ) are given in hertz. On a Shimadzu GCMSQP-1000EX mass spectrometer, the mass spectra were captured at a 70 eV energy level. The reactions were monitored by thin-layer chromatography (TLC) using TLC sheets coated with UV fluorescent silica gel Merck 60 F254 plates and were visualized using a UV lamp and different solvents as the mobile phase.

### 3.1.2. Chemical and reagents

*p*-Coumaric acid, ferulic acid, ethyl-2-chloroacetate, hydrazine hydrate, benzaldehyde, *m*-nitro benzaldehyde, anisaldehyde and 3,4,5 trimethoxy benzaldehyde were purchased from Aldrich (USA). Solvents and other reagents were of pure grade and used without further purification.

#### 2-Ethoxy-2-oxoethyl (*E*)-3-(4-(2-ethoxy-2-oxoethoxy)-3-substituted phenyl) acrylate (1a-b)

*p*-Coumaric acid/ ferulic acid (0.1 mol) was dissolved in *N,N*-dimethylformamide (DMF 100 ml) and mixed with anhydrous potassium carbonate (0.16 mol). Ethyl 2-chloroacetate (0.1 mol) was added, and the mixture refluxed for 12 h. The reaction mixture was cooled and poured into crushed ice. The crude product was filtered and recrystallized from ethanol <sup>1</sup>.

#### 2-Ethoxy-2-oxoethyl (*E*)-3-(4-(2-ethoxy-2-oxoethoxy)phenyl)acrylate (1a)

White; Yield 81 %; M.p.; 118-120 °C; IR (cm<sup>-1</sup>):1690(C=O),1248(C-O-C). EI-MS (m/z, %): 336 (M<sup>+</sup>); <sup>1</sup>H NMR (400 MHz, DMSO-d<sub>6</sub>):  $\delta$  7.72 (d,  $J$ = 8 Hz, 2H, Ar-H), 7.69 (d,  $J$ = 16 Hz, 1H, CH=CH), 6.99 (d,  $J$ = 8 Hz, 2H, Ar-H), 6.60 (d,  $J$ = 16 Hz, 1H, CH=CH), 4.86 (s, 2H, O-CH<sub>2</sub>), 4.76 (s, 2H, COO-CH<sub>2</sub>), 4.18 (q,  $J$ = 12 Hz, 4H, 2xCH<sub>2</sub> CH<sub>3</sub>), 1.22 (t,  $J$ = 8 Hz, 6H, 2xCH<sub>2</sub>-CH<sub>3</sub>). Anal.Calc'd. for C<sub>17</sub>H<sub>20</sub>O<sub>7</sub>: C, 60.71; H, 5.99; O, 33.30. Found: C,60.94 ; H,6.08.

#### 2-Ethoxy-2-oxoethyl(*E*)-3-(4-(2-ethoxy-2-oxoethoxy)-3 methoxyphenyl)acrylate (1b)

White; Yield 81 %; M.p.; 88-90 °C; IR (cm<sup>-1</sup>):1614(C=O),1275(C-O-C) EI-MS (m/z, %): 366 (M<sup>+</sup>); <sup>1</sup>H NMR (400 MHz, DMSO-d<sub>6</sub>):  $\delta$  7.67 (d,  $J$ = 16 Hz, 1H, CH=CH), 7.46 (s, 1H, Ar-H), 7.26 (d,  $J$ = 8 Hz, 1H, Ar-H), 6.91 (d,  $J$ = 8 Hz, 1H, Ar-H), 6.68 (d,  $J$ = 16 Hz, 1H, CH=CH), 4.84 (s, 2H, O-CH<sub>2</sub>), 4.77 (s, 2H, COO-CH<sub>2</sub>), 4.21-4.14 (m, 4H, 2xCH<sub>2</sub> CH<sub>3</sub>), 3.85

## Supplementary Information

(s, 3H, OCH<sub>3</sub>), 1.22 (t,  $J$ = 16 Hz, 6H, 2xCH<sub>2</sub>-CH<sub>3</sub>). Anal. Calcd. for C<sub>18</sub>H<sub>22</sub>O<sub>8</sub>: C, 59.01; H, 6.05; O, 34.94. Found: C, 59.23; H, 6.18.

### **2-Hydrazinyl-2-oxoethyl (*E*)-3-(4-(2-hydrazinyl-2-oxoethoxy)-3-substituted phenyl)acrylate (2a-b)**

A mixture of compound **1a-b** (0.01 mol) and hydrazine hydrate (0.02 mol) in methanol was refluxed in a water bath for 9 h. After cooling the separated solid was washed with water and dried to give a crude product which were obtained after recrystallization from ethanol<sup>2</sup>.

### **2-Hydrazinyl-2-oxoethyl(*E*)-3-(4-(2-hydrazinyl-2-oxoethoxy)phenyl)acrylate (2a)**

White; Yield 89 %; M.p.: 176-178 °C; IR (cm<sup>-1</sup>): 3451-3429 (NH<sub>2</sub>), 3296 (NH), 1615(C=O), 1259(C-O-C) EI-MS (m/z, %): 308 (M<sup>+</sup>); <sup>1</sup>H NMR (400 MHz, DMSO-d<sub>6</sub>): δ 9.38 (s, 2H, 2xNH), 7.68 (d,  $J$ = 8 Hz, 2H, Ar-H), 7.62 (d,  $J$ = 16 Hz, 1H, CH=CH), 7.00 (d,  $J$ = 8 Hz, 2H, Ar-H), 6.51 (d,  $J$ = 16 Hz, 1H, CH=CH), 4.55 (s, 2H, COO-CH<sub>2</sub>), 4.35 (s, 4H, 2xNH<sub>2</sub>), 3.72 (s, 2H, O-CH<sub>2</sub>). Anal. Calcd. for C<sub>13</sub>H<sub>16</sub>N<sub>4</sub>O<sub>5</sub>: C, 50.65; H, 5.23; N, 18.17; O, 25.95. Found: C, 50.83; H, 5.44; N, 18.40 .

### **2-Hydrazinyl-2-oxoethyl(*E*)-3-(4-(2-hydrazinyl-2-oxoethoxy)-3-methoxyphenyl) acrylate (2b)**

Pale yellow; Yield 91 %; M.p.: 145-147 °C; IR (cm<sup>-1</sup>): 3201-3067 (NH<sub>2</sub>), 2970(NH), 1657(C=O), 1264 (C-O-C). EI-MS (m/z, %): 338 (M<sup>+</sup>); <sup>1</sup>H NMR (400 MHz, DMSO-d<sub>6</sub>): δ 9.20 (s, 2H, 2xNH), 7.60 (d,  $J$ = 16 Hz, 1H, CH=CH), 7.39 (s, 1H, Ar-H), 7.23 (d,  $J$ = 8 Hz, 1H, Ar-H), 6.93 (d,  $J$ = 8 Hz, 1H, Ar-H), 6.59 (d,  $J$ = 16 Hz, 1H, CH=CH), 4.52 (s, 2H, COO-CH<sub>2</sub>), 4.34 (s, 4H, 2xNH<sub>2</sub>), 3.84 (s, 3H, OCH<sub>3</sub>), 3.72 (s, 2H, O-CH<sub>2</sub>). Anal. Calcd. for: C<sub>14</sub>H<sub>18</sub>N<sub>4</sub>O<sub>6</sub>: C, 49.70; H, 5.36; N, 16.56; O, 28.37. Found: C, 49.94; H, 5.48; N, 16.73 .

### **General procedure for the synthesis of target compounds (3a-h)**

A mixture of compound **2a-b** (0.01 mol) and appropriate aromatic aldehyde (0.01 mol) in the presence of trace amount of glacial acetic acid was refluxed for 5 h. (monitored by TLC) in methanol (20 mL). The solvent was removed under reduced pressure and the product was recrystallized from chloroform<sup>3</sup>.

## Supplementary Information

### 3.2.4 *In vivo* studies

#### 3.2.4.1 Animals and tumor cell lines

Adult female Swiss albino mice purchased from Theodor Bilharzia Research Institute, Giza, Egypt, with an average body weight of (18-23) g were used. Mice were housed under constant conditions of 12 h light/dark cycle in a temperature-controlled environment under conditions of controlled humidity ( $22 \pm 2$  °C), with free access to standard laboratory mice food and water.

Solid Ehrlich carcinoma (SEC) cells were obtained from the National Cancer Institute (Cairo University, Egypt). The tumor cell line was proliferated in mice through serial intraperitoneal (I.P.) transplantation of a volume of 0.2 mL physiological saline containing  $1 \times 10^6$  viable cells for 24 h. SEC cells were collected 7 days after I.P. implantation. The harvested cells were diluted with saline to obtain a concentration of  $5 \times 10^6$  viable SEC cells/mL. A volume of 0.2 mL saline contains  $1 \times 10^6$  SEC cells that were I.P. implanted into each normal mouse. SEC cells ( $1 \times 10^6$  tumor cells/mouse) were implanted subcutaneously into the right thigh of the hind limb.

The experimental animals were randomly divided into four groups. Group 1 served as the normal saline control. Group 2 served as the SEC control ( $1 \times 10^6$  cells/mouse). Group 3 served as the compound **3f**-treated group (6 mg/kg B.Wt., I.P.). Group 4 received the standard anti-cancer drug of Sorafenib (6 mg/kg BW, I.P.) and is considered the reference control. Body weight and survival were recorded daily until the 24<sup>th</sup> day in both treated and control groups. At the end of the experiment, the anesthetized animals were then sacrificed for the examination of the antitumor activity examination.

#### 3.2.4.2. Antitumor potentiality

It includes tumor volume, weight, and tumor inhibition ratio (TIR%). Time interval measurements of tumor volume using a digital Vernier caliper (Tricle Brand, Shanghai, China). Measure tumor length and width using clipper and then calculate tumor volume using formulations  $V = (L \times W \times W)/2$ , where V is tumor volume, W is tumor width, L is tumor length. While TIR% was calculated

according to the following equation 
$$\frac{\text{Tumor volume (Control)} - \text{Tumor volume (treated)}}{\text{Tumor volume (control)}} \times 100$$

## Supplementary Information

### 3.2.4.3. Histological examinations

Solid ascites tissue samples are usually collected and fixed in neutral formalin. After fixation, the specimens undergo dehydration and clearing processes. The tissues are then embedded in paraffin wax to provide support for sectioning into thin slices of approximately 4-5 micrometers. These sections are stained with Hematoxylin and Eosin (H&E) to assess general tissue structure. The slides are then examined blindly under a light microscope to evaluate histopathological features and associated pathological changes according to Frajacomo, de Souza Padilha.

### 3.2.4.4. Immunohistochemical preparation

Sections (4  $\mu\text{m}$ ) were deparaffinized, rehydrated, and endogenous peroxidase activity was quenched using 3% hydrogen peroxide. Heat-induced epitope retrieval was performed in either citrate buffer (pH 6.0) or Tris-EDTA (pH 9.0) for 20 min at 95–100 °C, depending on the target antigen. After cooling and PBS washing, nonspecific binding was blocked with a commercial protein blocking solution. Sections were incubated with anti-BCL-2 (clone 124, 1:100, CST), anti-cleaved caspase-3 (Asp175, 1:100, CST), and anti-EGFR (clone 31G7, 1:50, Thermo Fisher). Detection was achieved with a polymer-based HRP/DAB system (Dako EnVision™ K5007) and hematoxylin counterstaining. Stained slides were examined under light microscopy, and five representative high-power fields ( $\times 400$ ) per case were analyzed. For objective quantification, digital images were processed in ImageJ. Values from five fields per case were averaged for analysis.

### References

- 1 N. Manju, B. Kalluraya, K. Byrappa, M. Abdoh, *IUCrData* **2016**, *1*, 10.1107/S2414314616015947.
- 2 S. Kumar, P. Kumar, N. Sati, *Journal of Pharmacy & Bioallied Sciences* **2012**, *4*, 246.
- 3 R. Elrayess, N. Ghareb, M. Azab, M. Said, *Life Science Journal* **2020**, *10*, 1784-1793.

# Supplementary Information

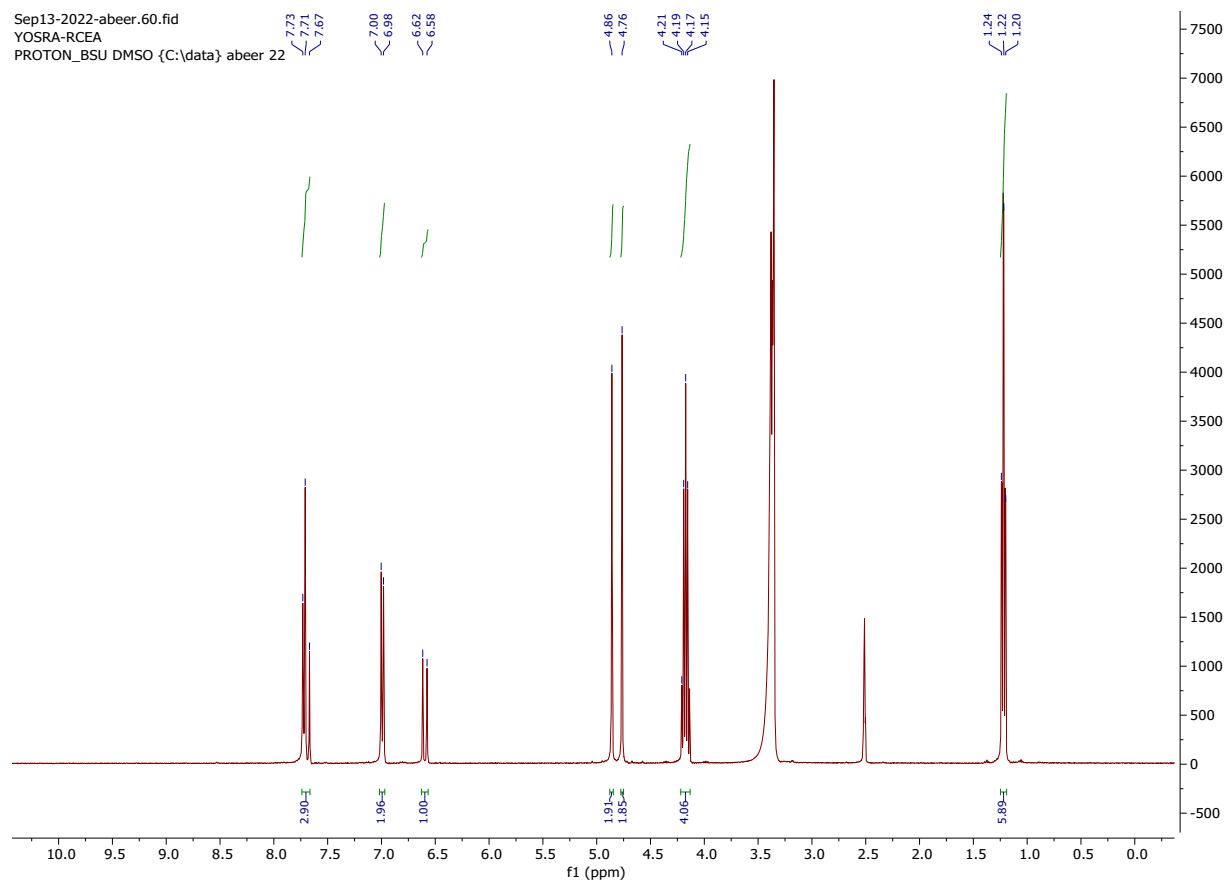

Fig. S1. <sup>1</sup>H-NMR of compound 1a

## Supplementary Information

Sep13-2022-abeer.40.fid  
YOSRA-RET  
PROTON\_BSU DMSO {C:\data} abeer 20

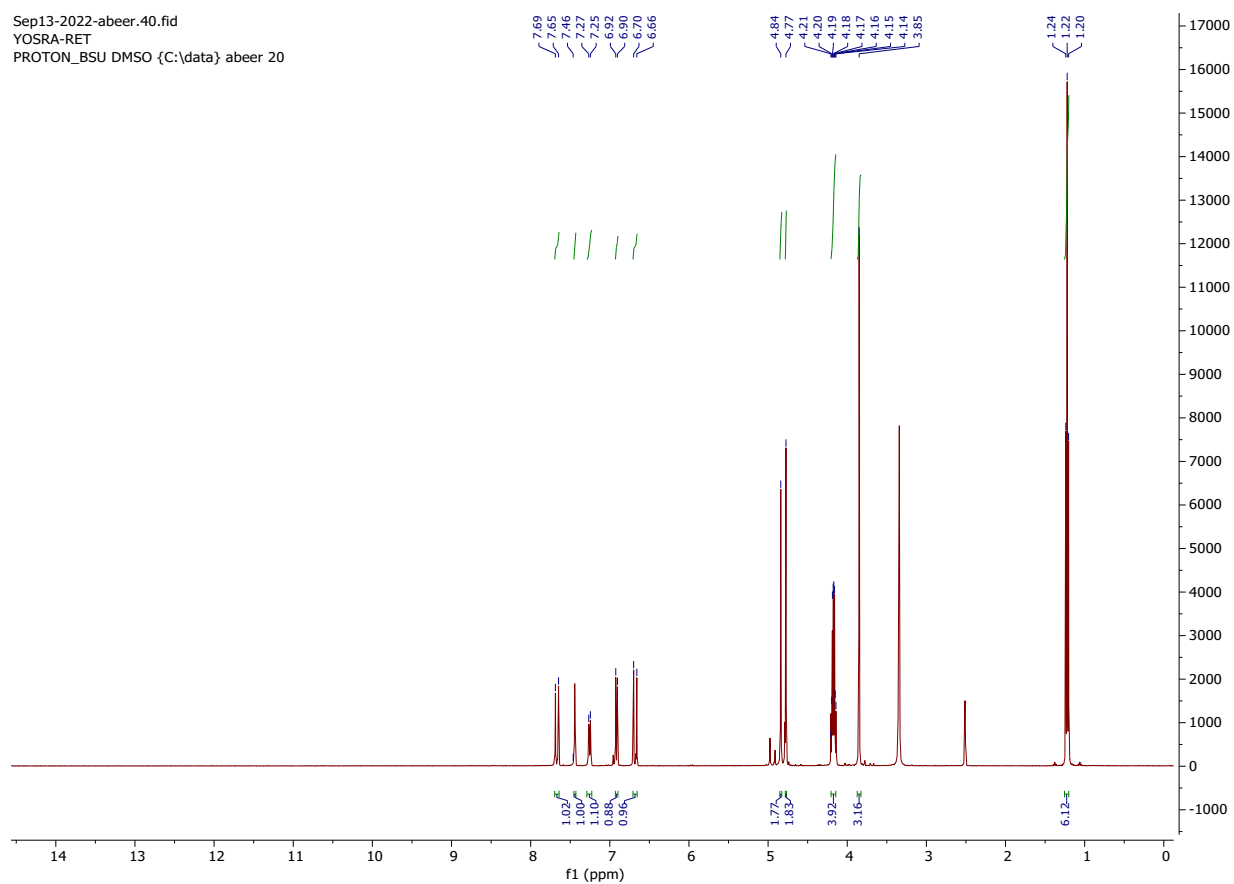

Fig. S2. <sup>1</sup>H-NMR of compound 1b

# Supplementary Information

Sep13-2022-abeer.50.fid  
YOSRA-RCH  
PROTON\_BSU DMSO (C:\data) abeer 21

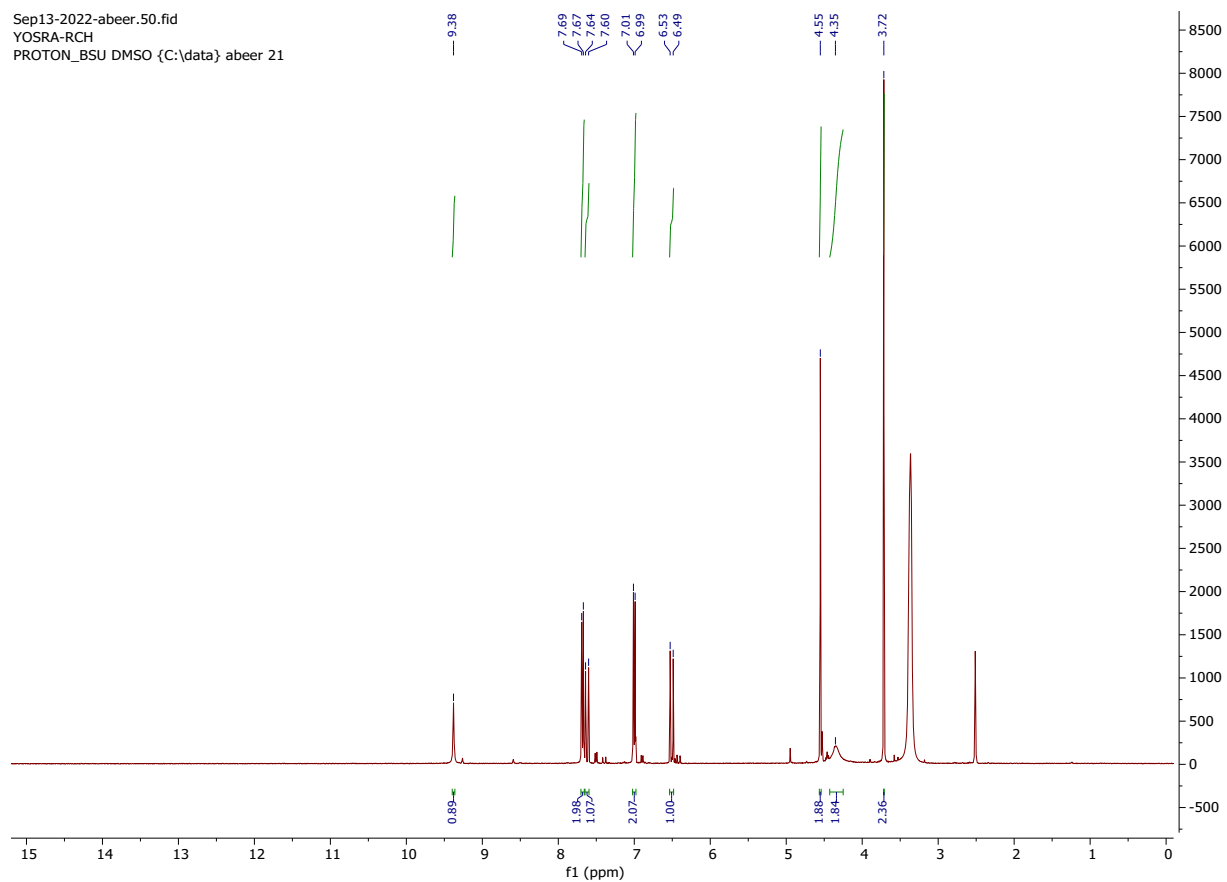

Fig. S3. <sup>1</sup>H-NMR of compound 2a

## Supplementary Information

Sep13-2022-abeer.70.fid  
YOSRA-RNH2  
PROTON\_BSU DMSO {C:\data} abeer 23

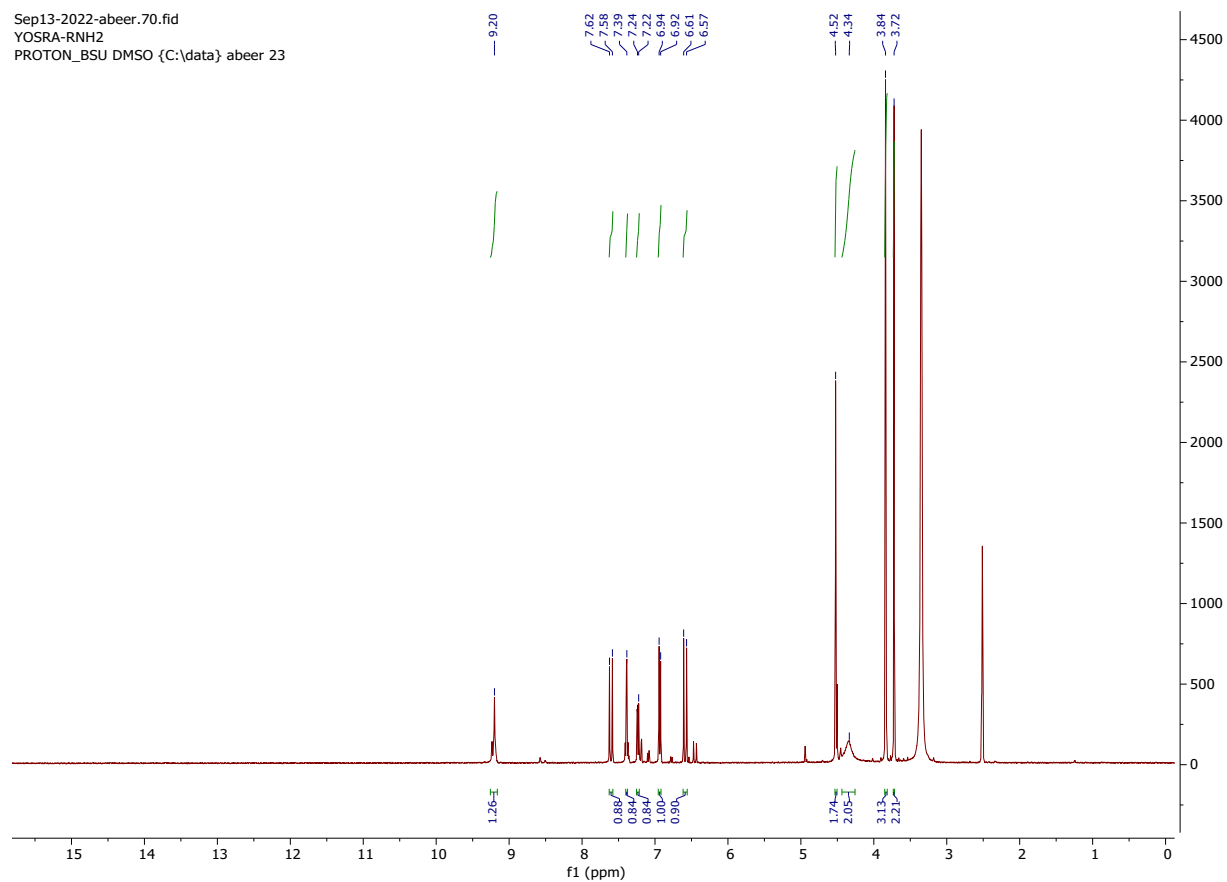

Fig. S4.  $^1\text{H-NMR}$  of compound 2b

# Supplementary Information

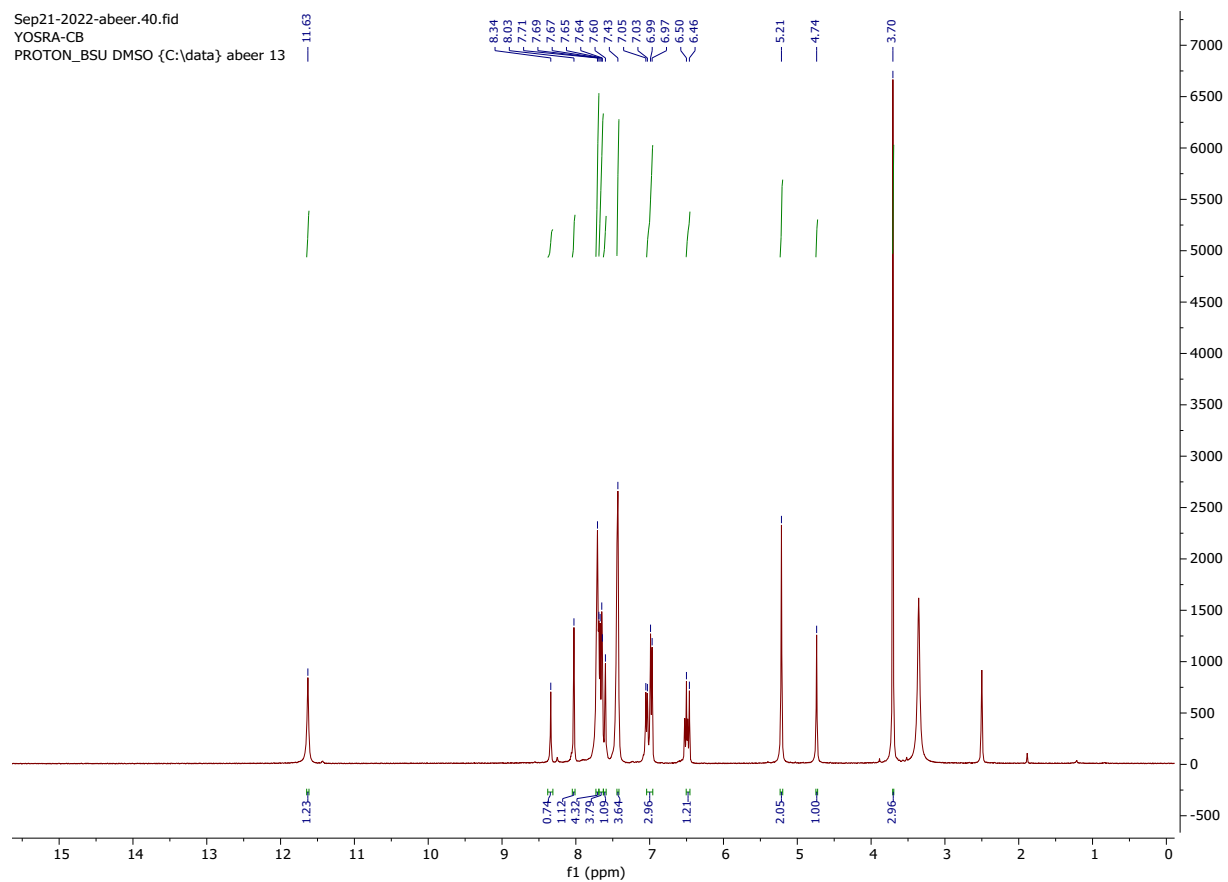

Fig. S5.  $^1\text{H-NMR}$  of compound 3a

## Supplementary Information

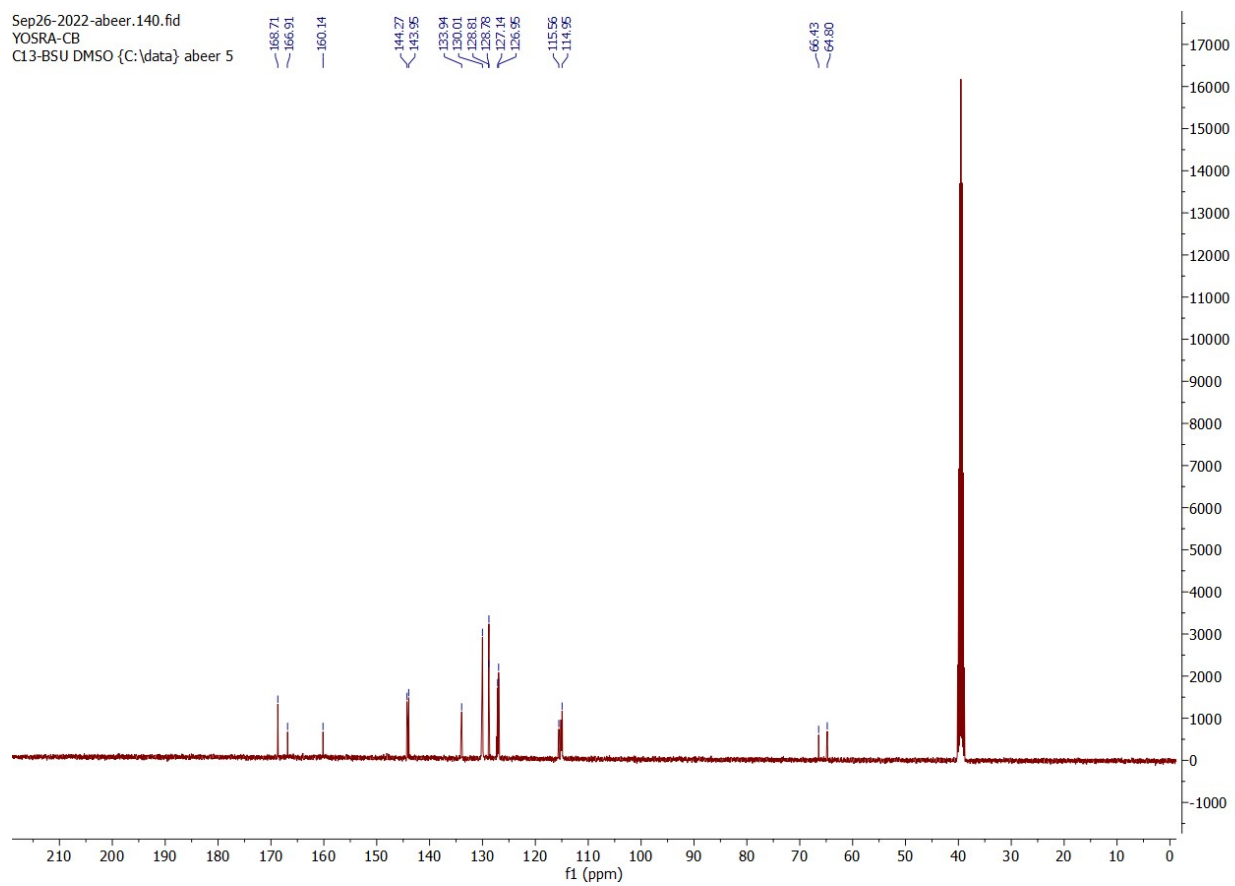

**Fig. S6.**  $^{13}\text{C}$ -NMR of compound 3a

# Supplementary Information

Sep13-2022-aber.10.fid  
YOSRA-RCM  
PROTON\_BSU DMSO {C:\data} aber 17

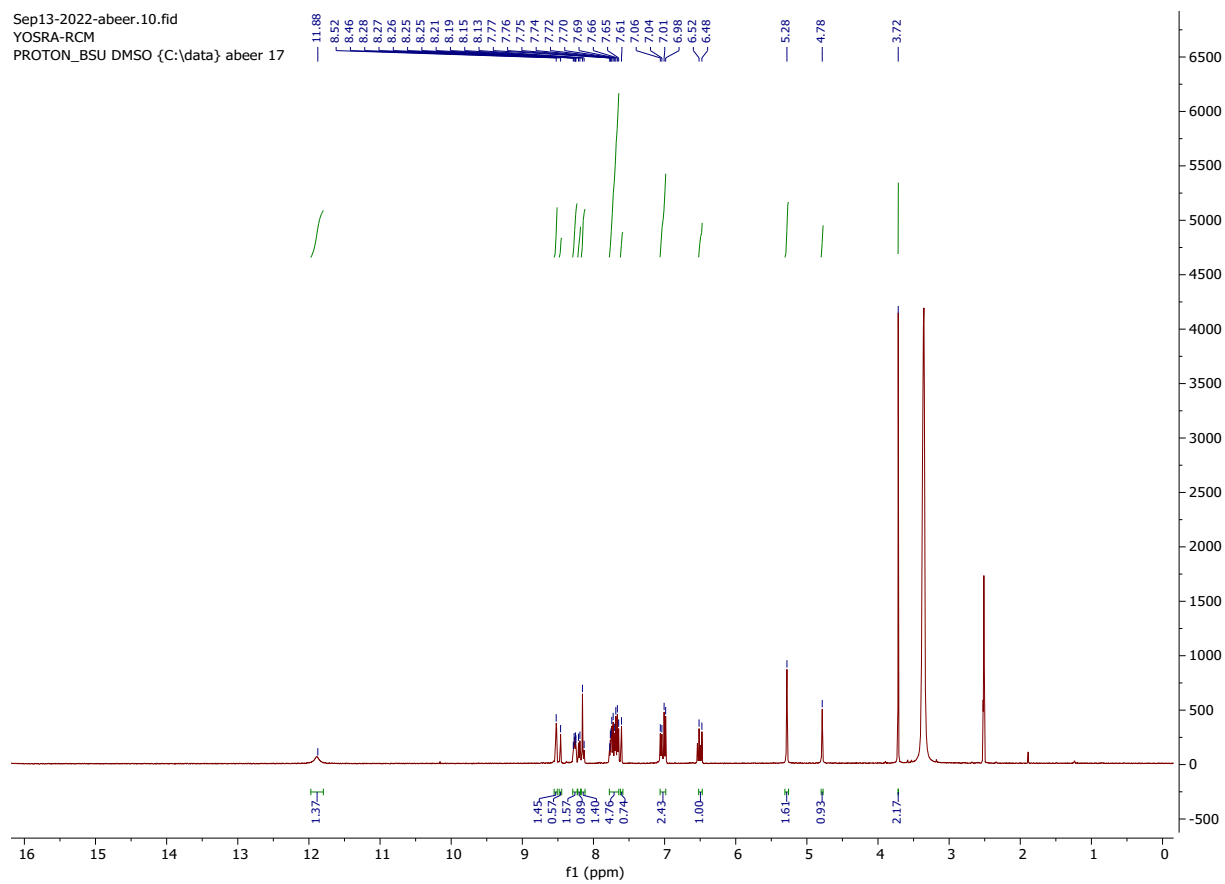

Fig. S7. <sup>1</sup>H-NMR of compound 3b

## Supplementary Information

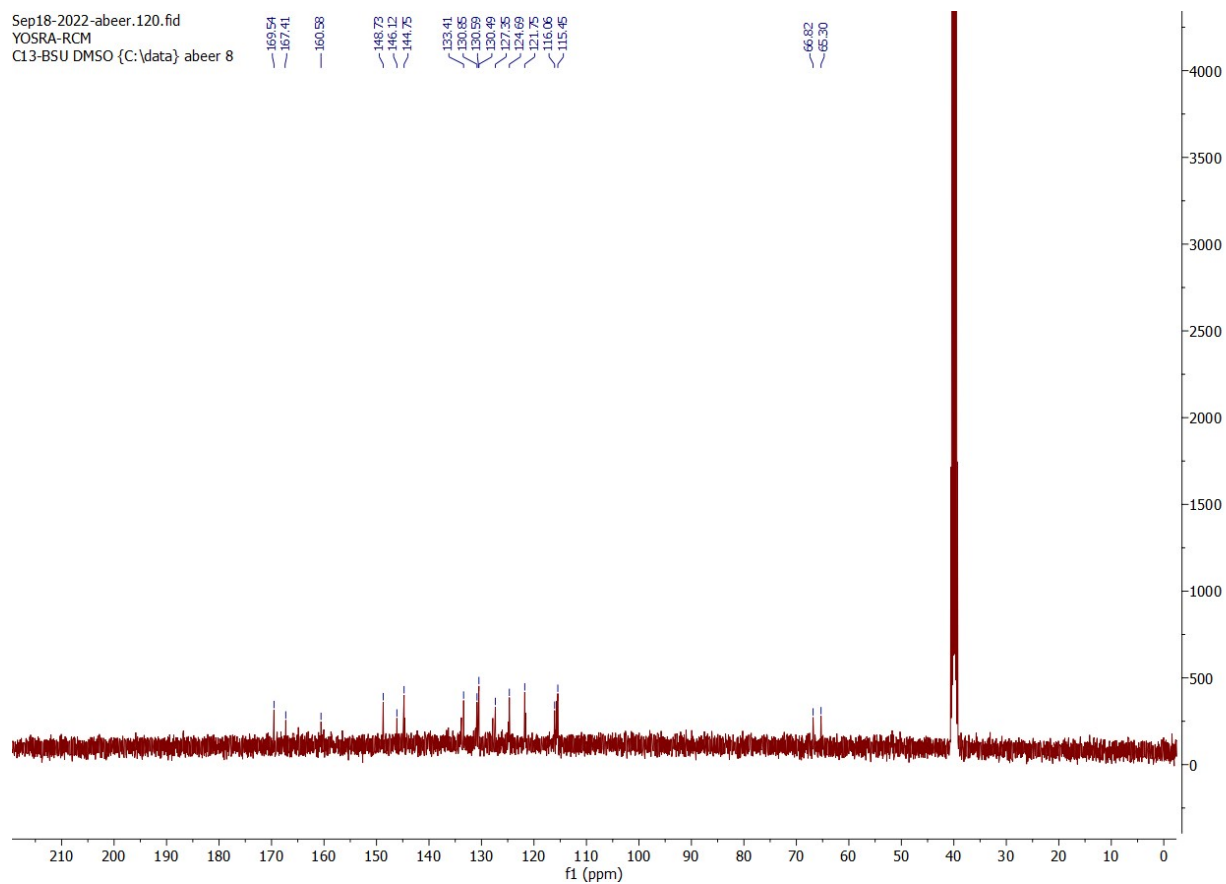

**Fig. S8.**  $^{13}\text{C}$ -NMR of compound **3b**

# Supplementary Information

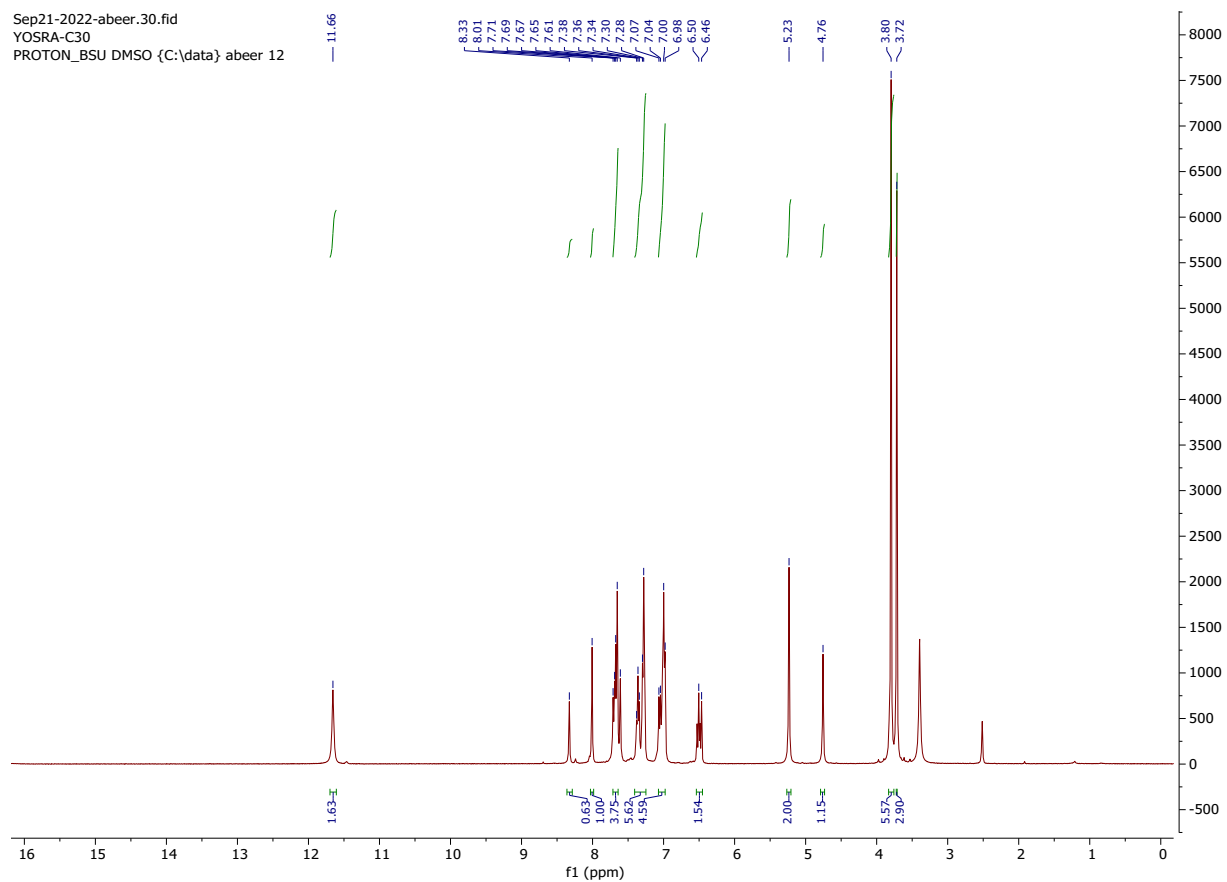

Fig. S9.  $^1\text{H-NMR}$  of compound 3c

## Supplementary Information

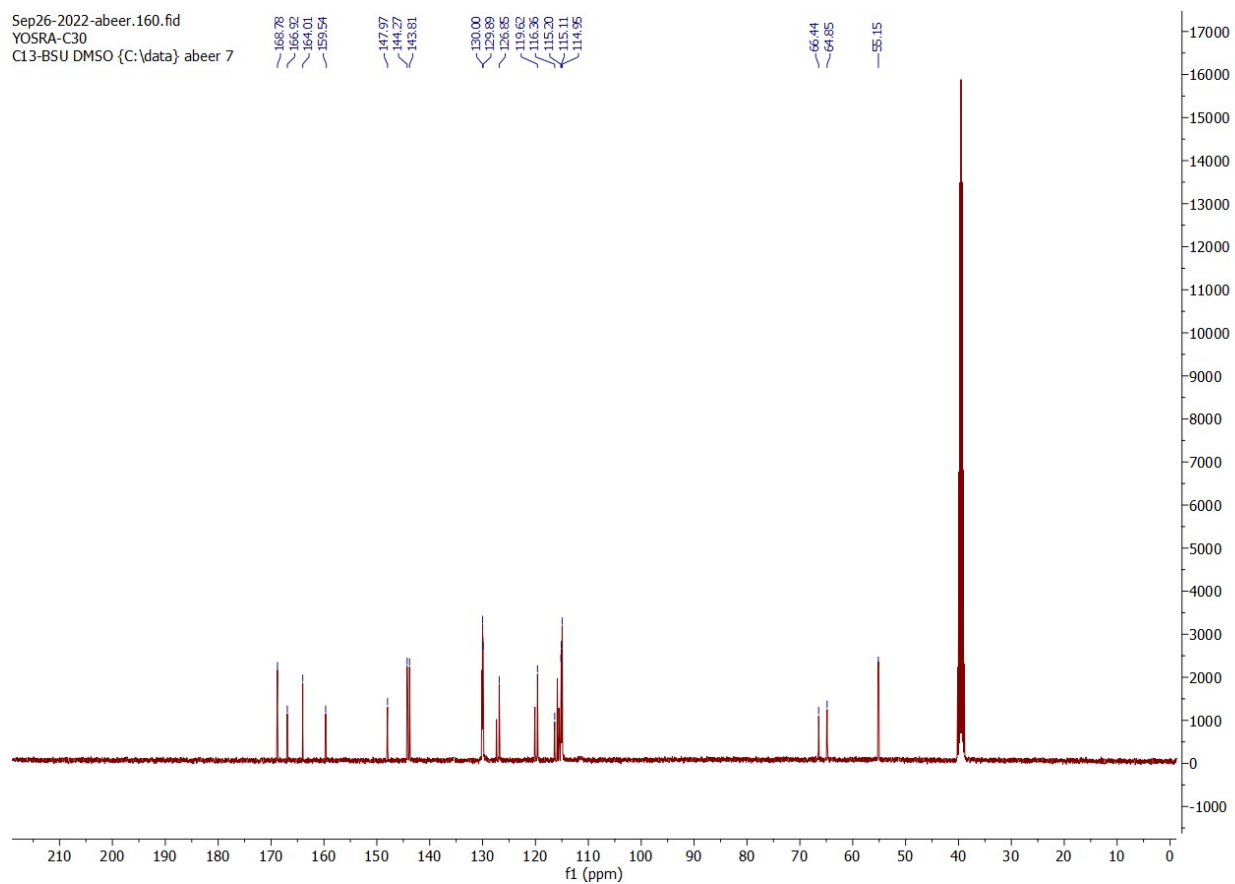

**Fig. S10.**  $^{13}\text{C}$ -NMR of compound **3c**

# Supplementary Information

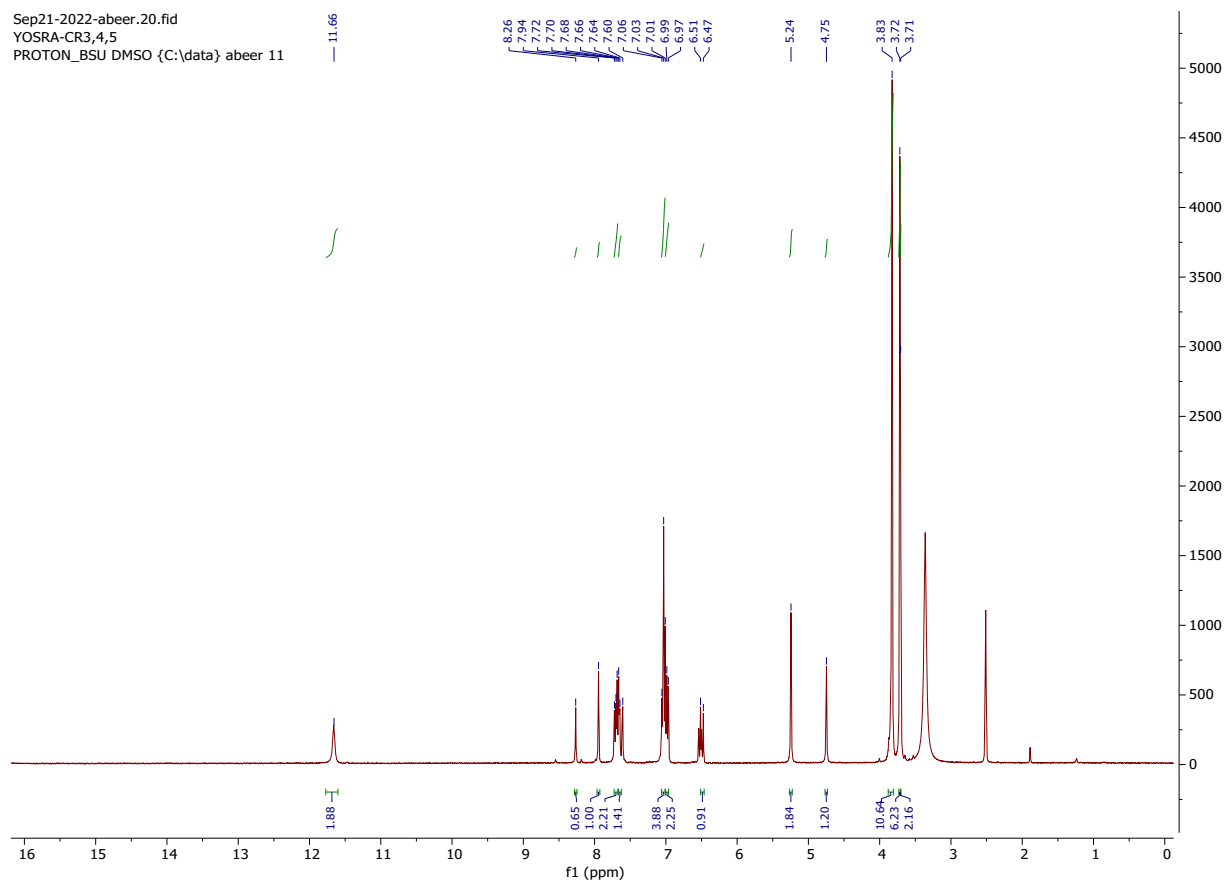

Fig. S11.  $^1\text{H-NMR}$  of compound 3d

## Supplementary Information

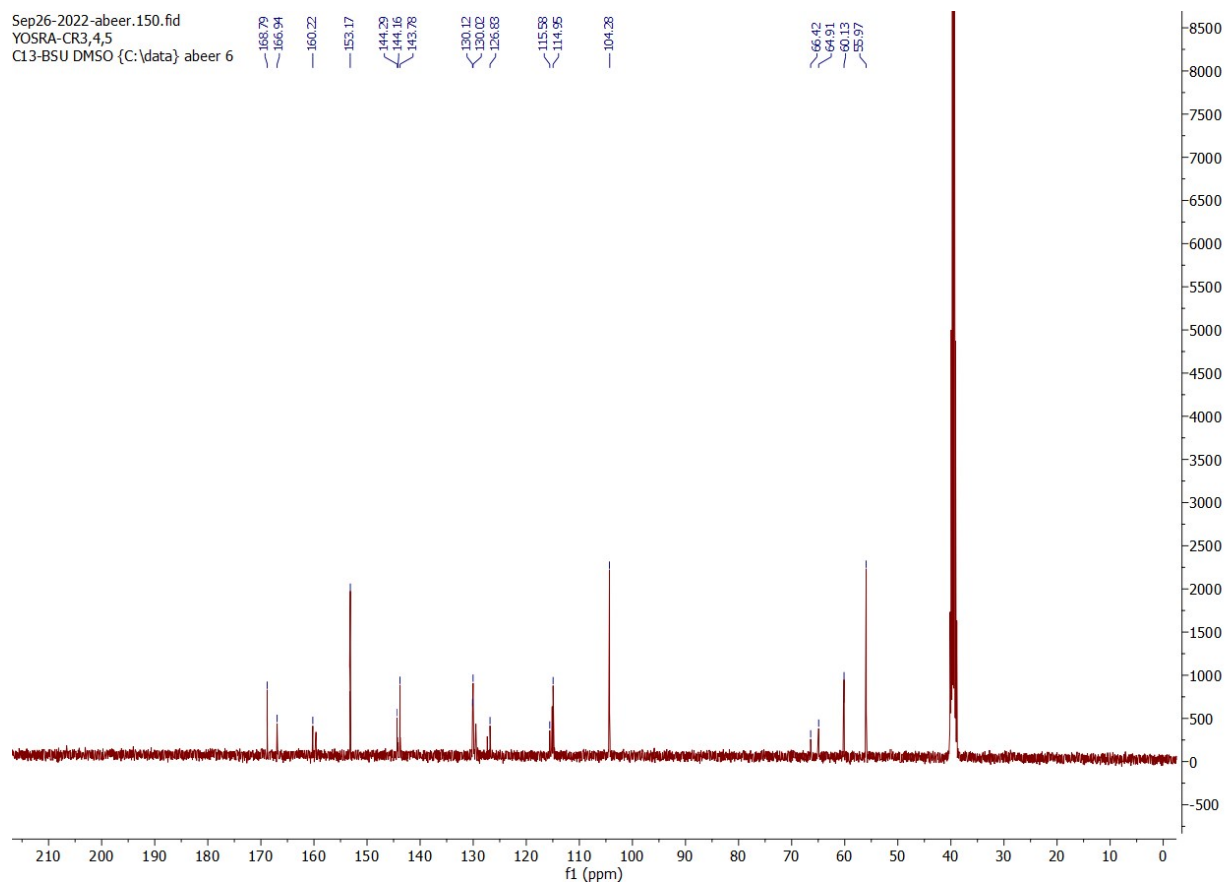

Fig. S12.  $^{13}\text{C}$ -NMR of compound 3d

# Supplementary Information

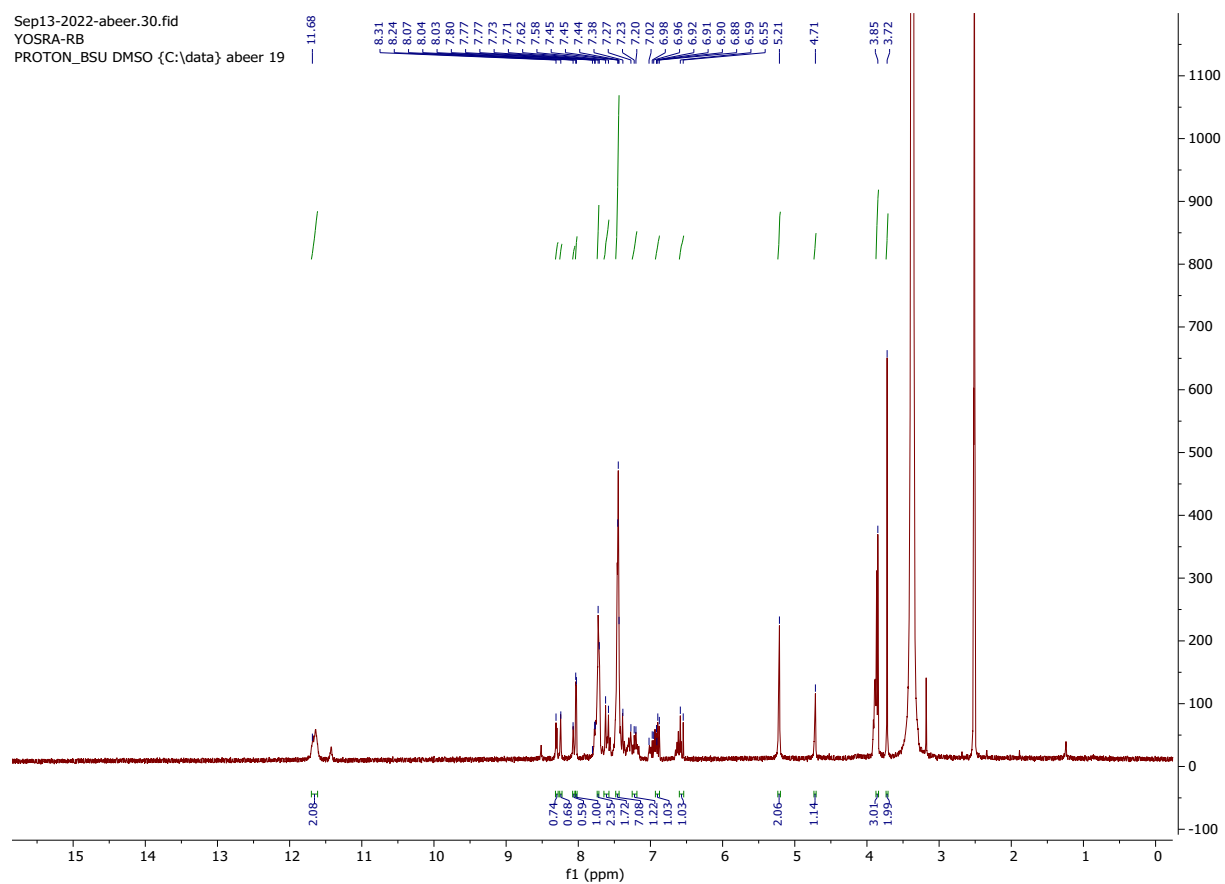

Fig. S13. <sup>1</sup>H-NMR of compound 3e

## Supplementary Information

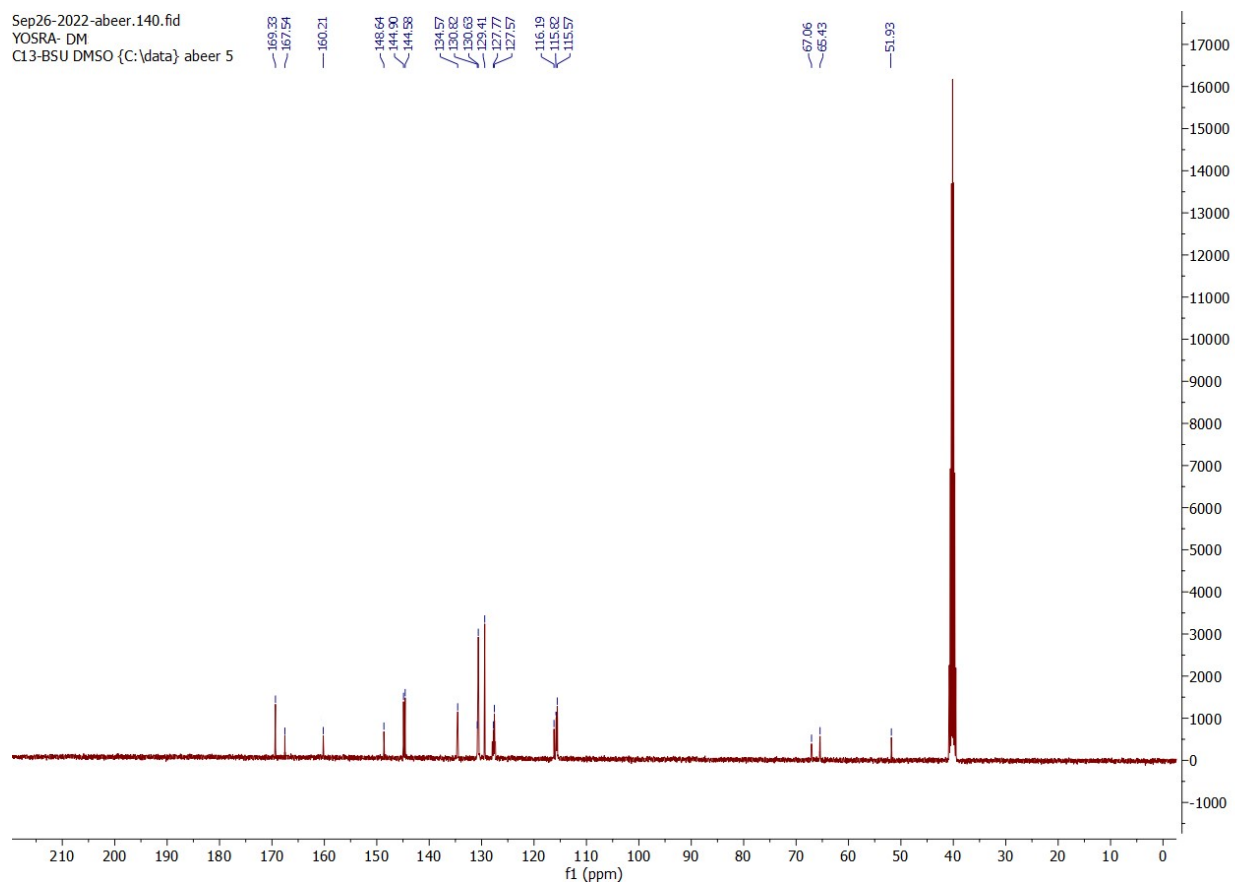

**Fig. S14.**  $^{13}\text{C}$ -NMR of compound **3e**

# Supplementary Information

Aug10-2022-abeer.60.fid  
YOSRA KH-Y  
PROTON\_BSU DMSO (C:\data) abeer 11

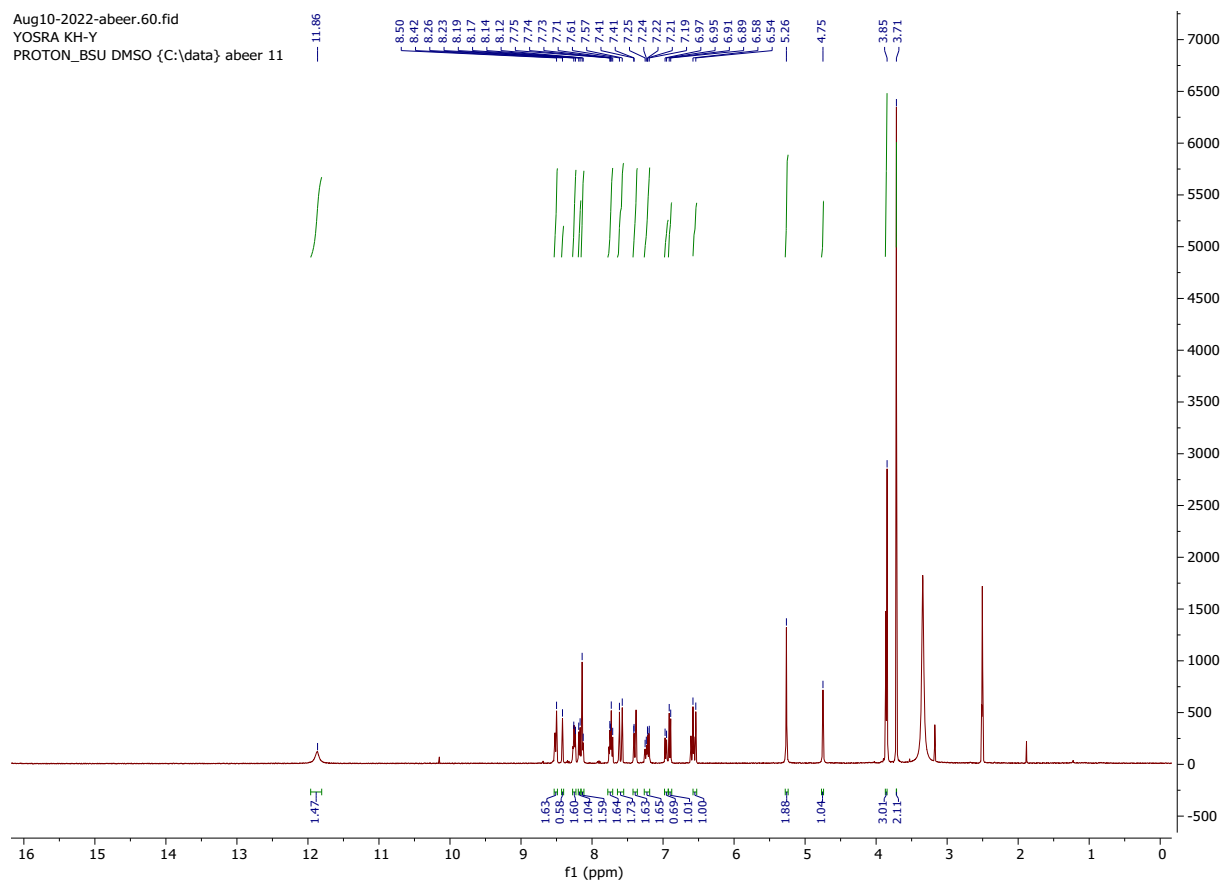

Fig. S15. <sup>1</sup>H-NMR of compound 3f

## Supplementary Information

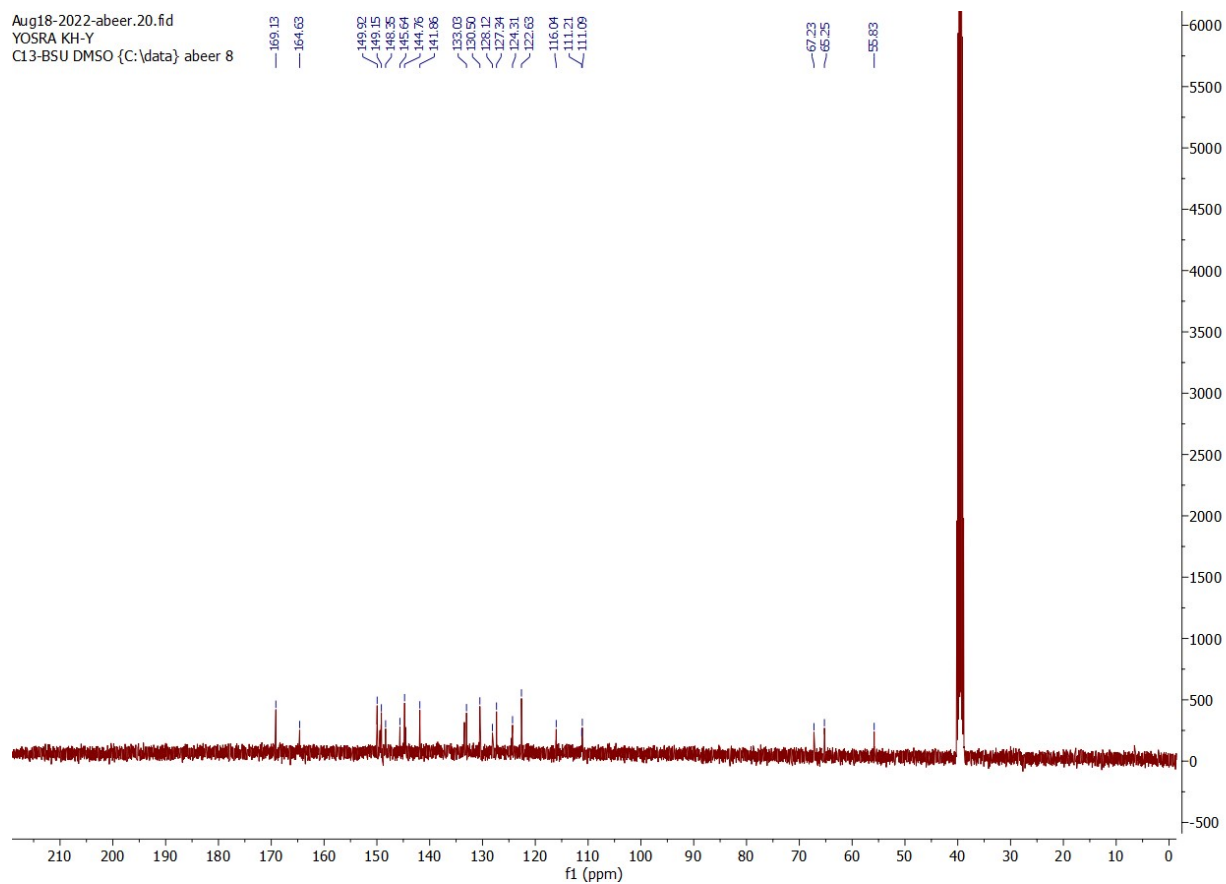

**Fig. S16.**  $^{13}\text{C}$ -NMR of compound **3f**

# Supplementary Information

Sep13-2022-aber.20.fid  
YOSRA-R30C  
PROTON\_BSU DMSO (C:\data\ aber 18

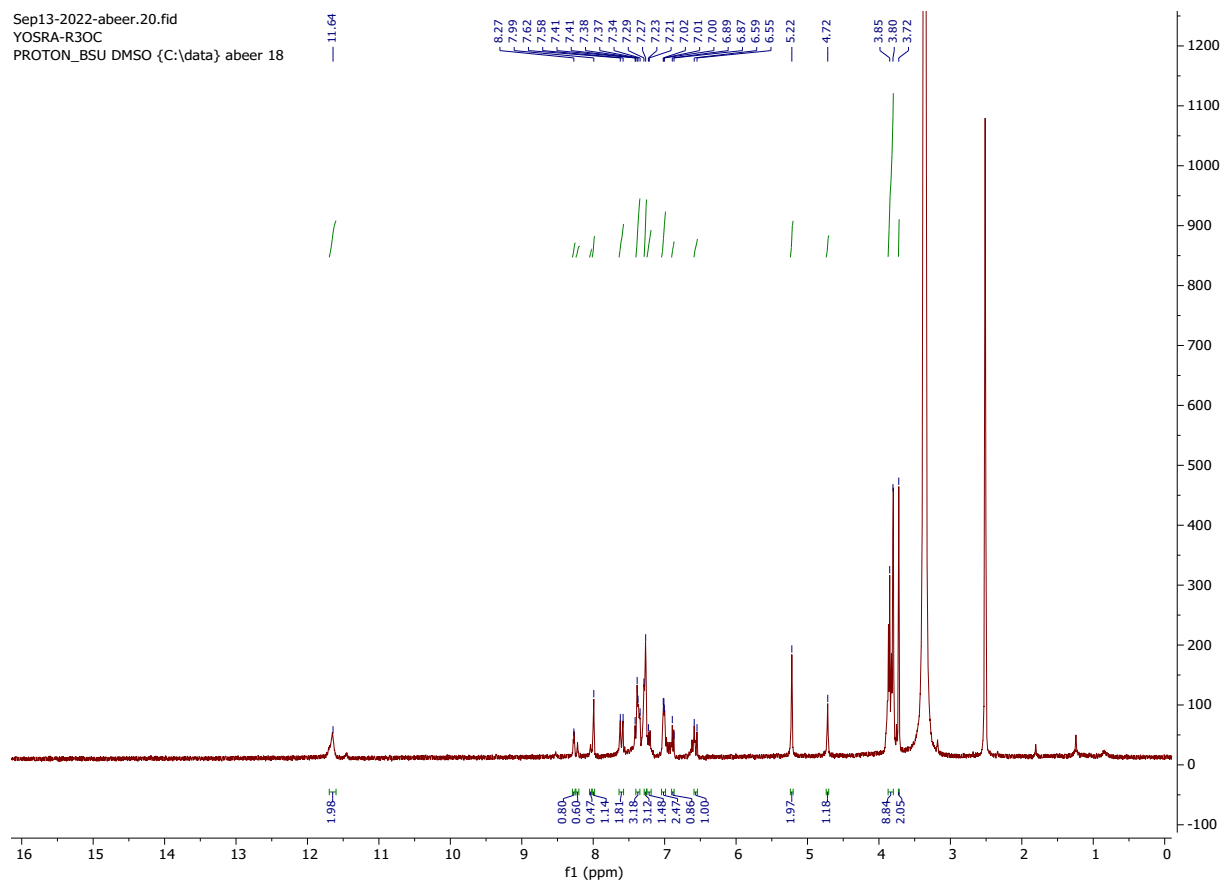

Fig. S17. <sup>1</sup>H-NMR of compound 3g

## Supplementary Information

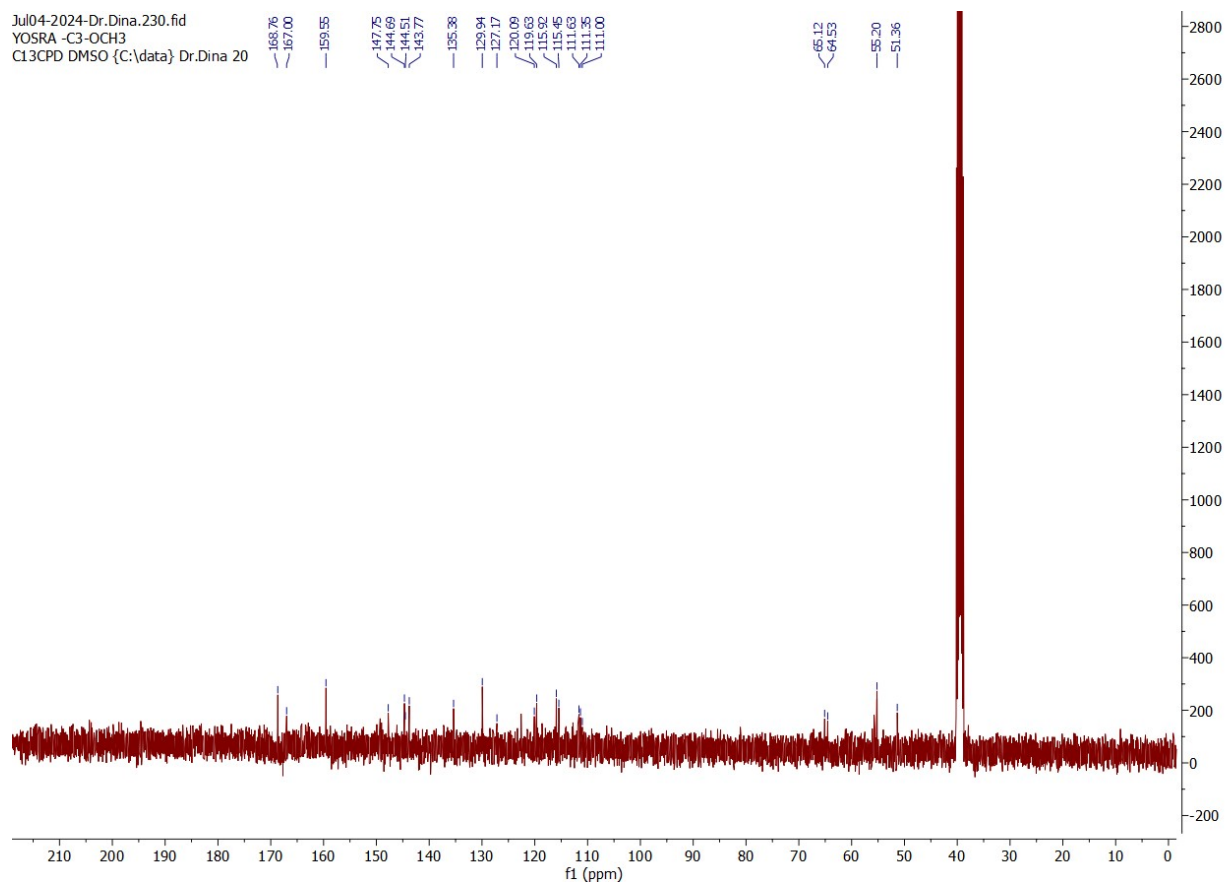

Fig. S18.  $^{13}\text{C}$ -NMR of compound 3g

# Supplementary Information

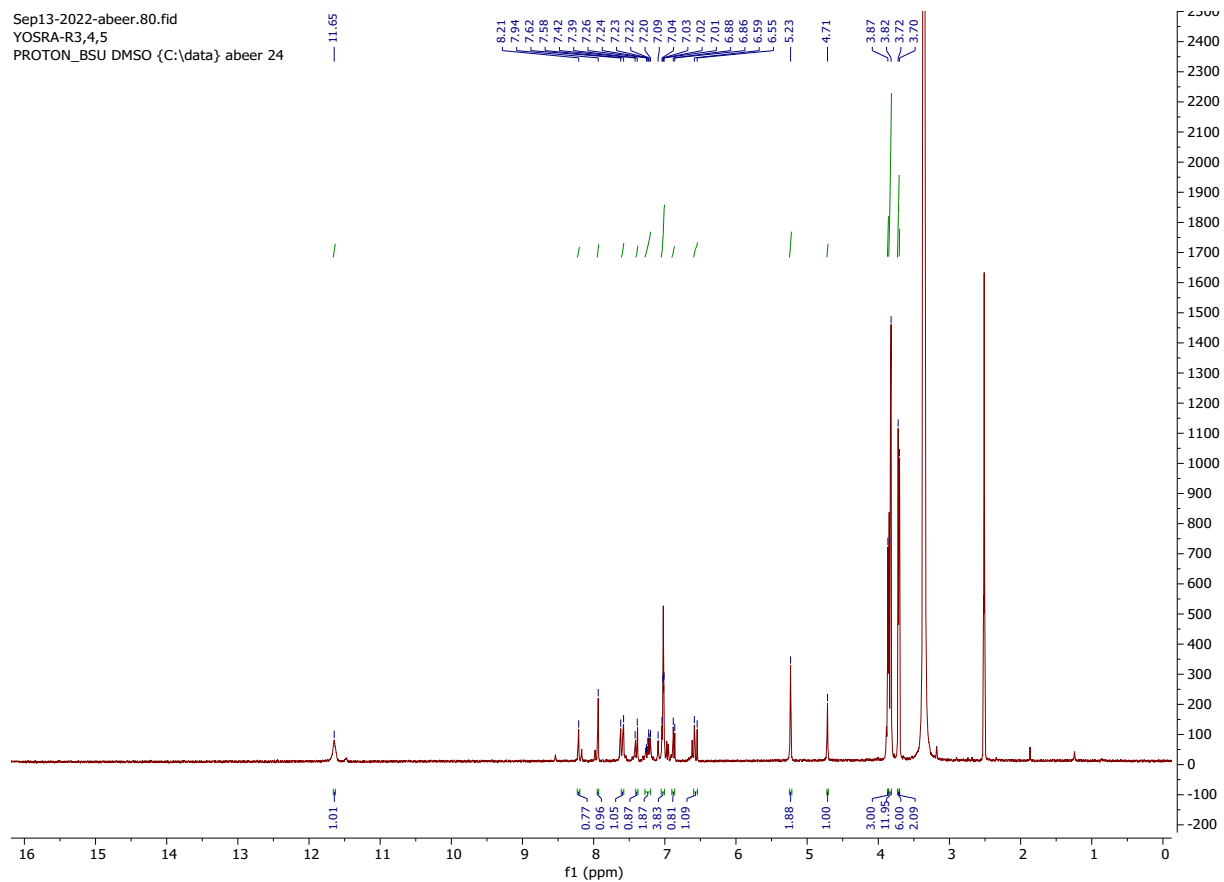

Fig. S19. <sup>1</sup>H-NMR of compound 3h

## Supplementary Information

Aug04-2024-Dr.Dina.60.fid  
YOSRAAZAZ-F.3--4.5  
C13CPD DMSO {C:\data} Dr.Dina 17

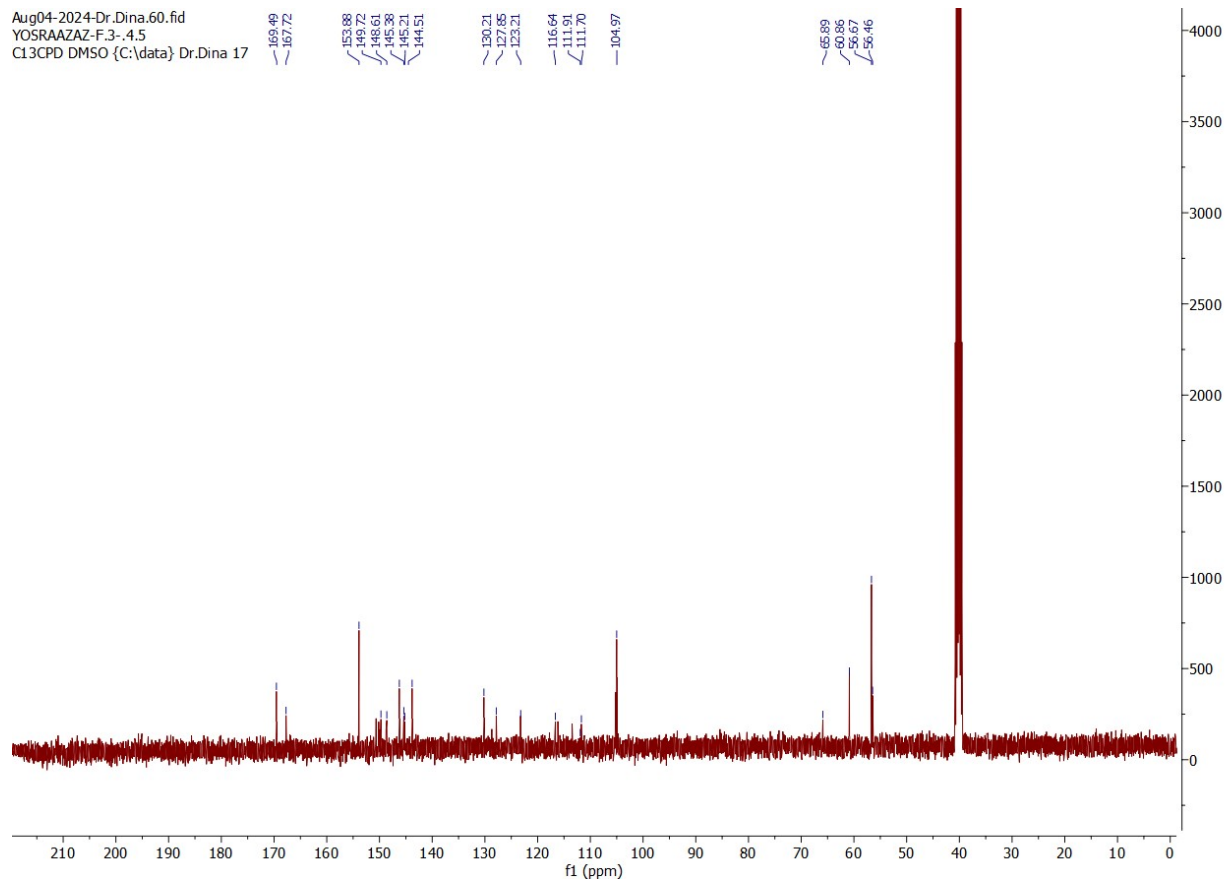

Fig. S20.  $^{13}\text{C}$ -NMR of compound 3h

## Supplementary Information

|                    |            |              |            |                         |                          |                                |            |              |            |                         |                          |                                |
|--------------------|------------|--------------|------------|-------------------------|--------------------------|--------------------------------|------------|--------------|------------|-------------------------|--------------------------|--------------------------------|
| <b>Sample code</b> | <b>C-B</b> | <b>C-EST</b> | <b>C-H</b> | <b>C-NO<sub>2</sub></b> | <b>C-OCH<sub>3</sub></b> | <b>C-3,4,5-OCH<sub>3</sub></b> | <b>F-B</b> | <b>F-EST</b> | <b>F-H</b> | <b>F-NO<sub>2</sub></b> | <b>F-OCH<sub>3</sub></b> | <b>F-3,4,5-OCH<sub>3</sub></b> |
| <b>Paper code</b>  | 3a         | 1a           | 2a         | 3b                      | 3c                       | 3d                             | 3e         | 1b           | 2b         | 3f                      | 3g                       | h                              |



**جامعة الأزهر**  
**Al-Azhar University**  
**المركز الإقليمي للفطريات وتطبيقاتها**  
**The Regional Center for Mycology and Biotechnology**

**Requester Data:**

**Name:** Dr. Yousra Khaled Hasanin Fadel  
**Authority:** Faculty of Pharmacy, Suez Canal University

**Sample Data:**  
 Twelve samples had been submitted for elemental analysis.

**Analysis Report:**

| Sample Code              | C%    | H%   | N%    |
|--------------------------|-------|------|-------|
| C-B                      | 67.19 | 5.07 | 11.78 |
| C-EST                    | 60.94 | 6.08 | 0     |
| C-H                      | 50.83 | 5.44 | 18.40 |
| C-NO <sub>2</sub>        | 64.15 | 5.29 | 10.45 |
| C-OCH <sub>3</sub>       | 56.71 | 3.98 | 14.89 |
| C-3,4,5-OCH <sub>3</sub> | 59.80 | 5.67 | 8.69  |
| F-B                      | 49.94 | 5.48 | 16.73 |
| F-EST                    | 59.23 | 6.18 | 0     |
| F-H                      | 65.62 | 5.19 | 11.06 |
| F-NO <sub>2</sub>        | 55.49 | 4.13 | 14.15 |
| F-OCH <sub>3</sub>       | 62.88 | 5.41 | 9.94  |
| F-3,4,5-OCH <sub>3</sub> | 59.05 | 5.67 | 8.26  |

**INVESTIGATOR**

*Dr. y.s. m. fadel*

**DIRECTOR**

*M. Mansour*

*17.7.2024*



شارع المسليم الدائم - مدينة نصر - القاهرة  
 البريد الإلكتروني: [remb@azhar.edu.eg](mailto:remb@azhar.edu.eg)  
 الموقع الإلكتروني:  
 هاتف: ١٧٤١ مدينة نصر للقاهرة

تلفون: ٢٢٢٢.٢٧٢ (٠٢٠٢) فاكس: ٢٢٢٢.٢٧٢ (٠٢٠٢)  
<http://www.azhar.edu.eg.htm>  
[http://www.azhar.edu.eg/pages/fungi\\_center.htm](http://www.azhar.edu.eg/pages/fungi_center.htm)  
 Facebook: RCMB AZHAR

Figure S21. Elemental analysis of synthesized compounds 1a-b, 2a-b and 3a-h

## Supplementary Information

Figure S22. Mass spectrum of compound 1a

RT: 1.75 - 1.97 SM: 7B

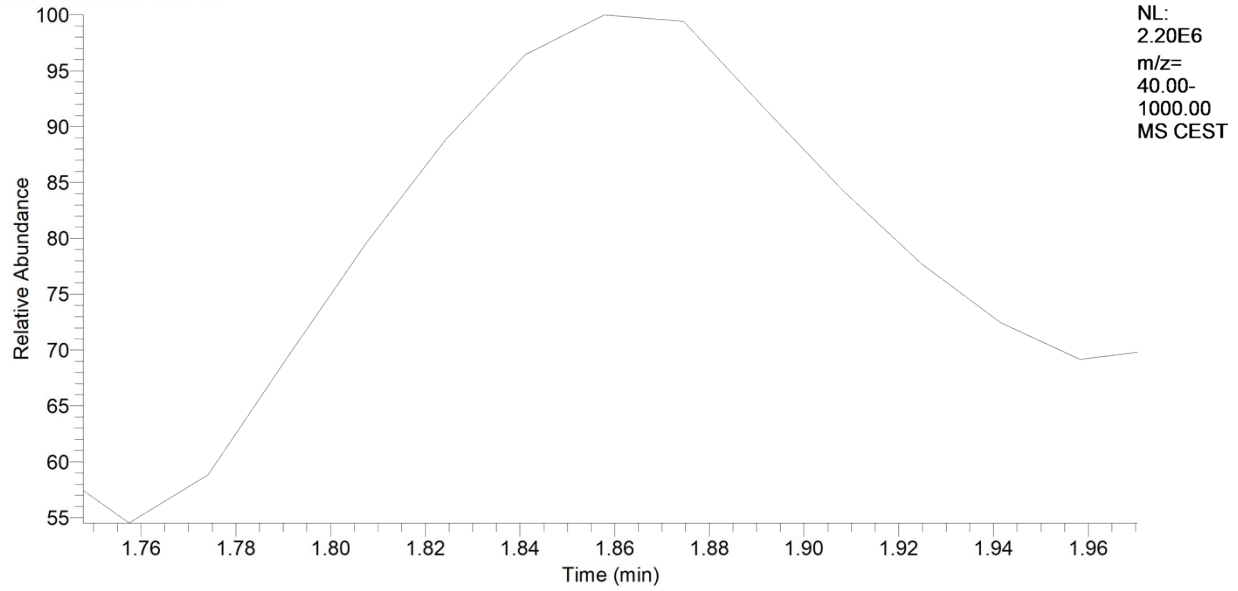

CEST #167 RT: 2.81 P: + NL: 3.07E2  
T: {0,0} + c EI Full ms [40.00-1000.00]

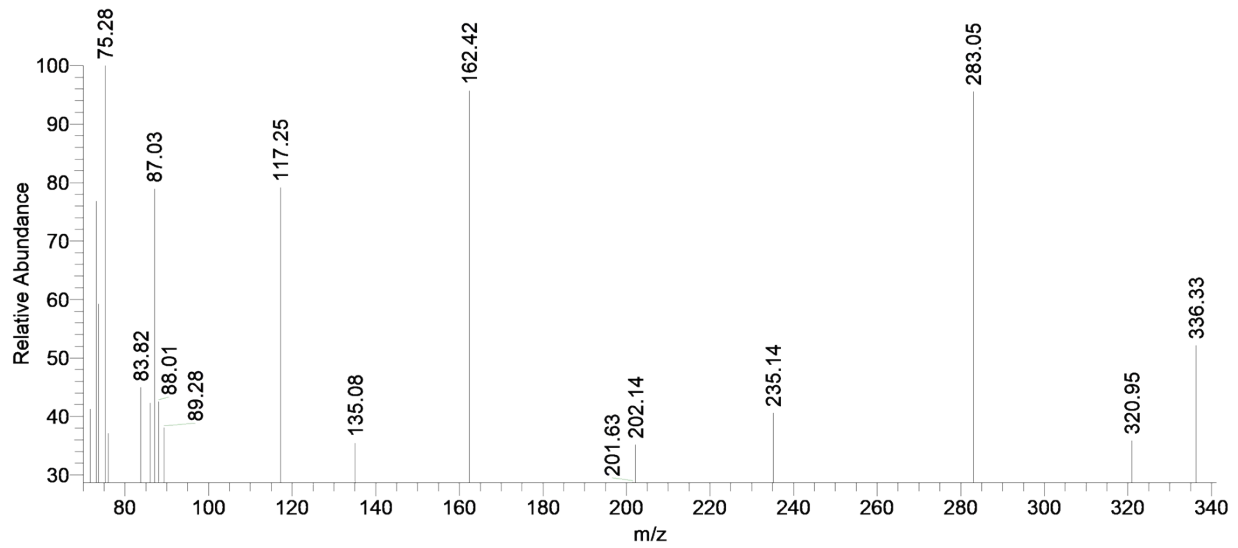

## Supplementary Information

Figure S23. Mass spectrum of compound 1b

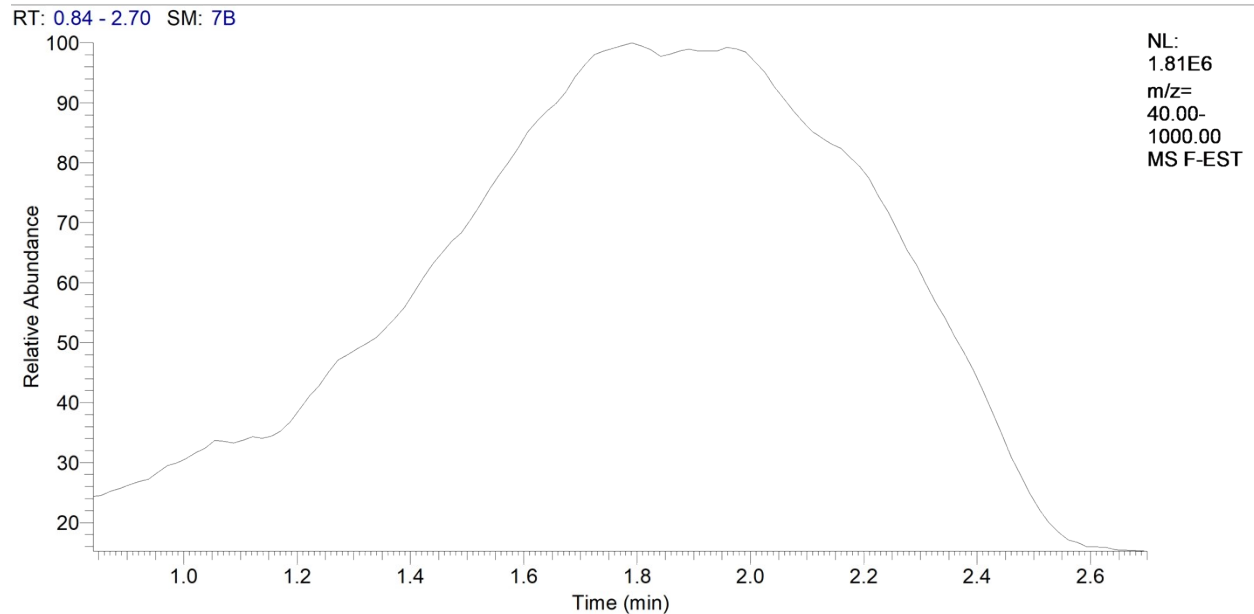

F-EST #304 RT: 5.10 P: + SB: 25 3.93-4.03, 3.88-4.17 NL: 1.11E3  
T: {0,0} + c EI Full ms [40.00-1000.00]

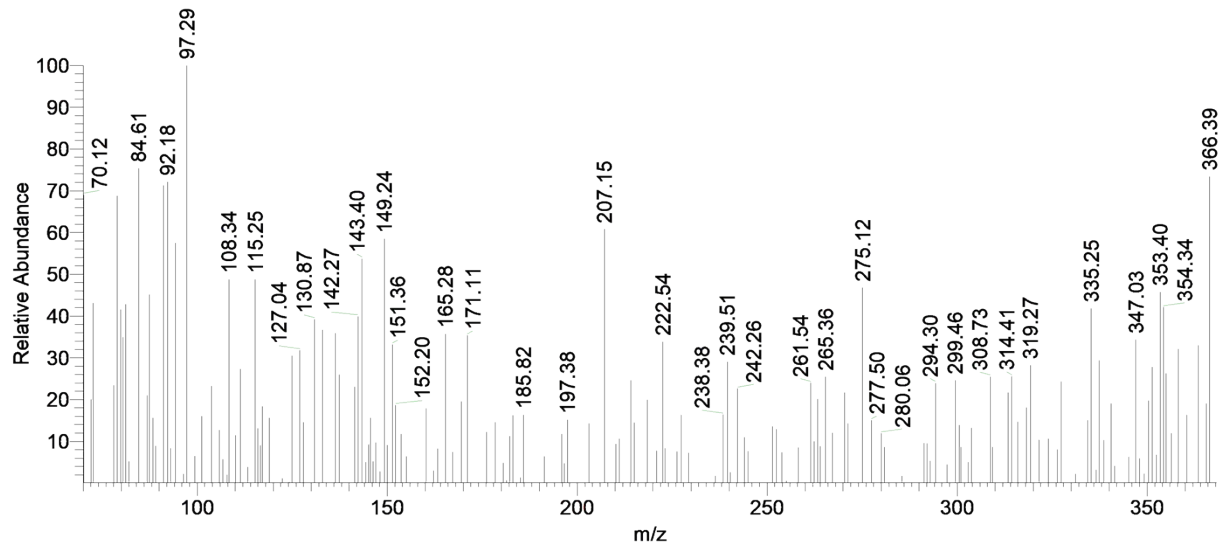

## Supplementary Information

Figure S24. Mass spectrum of compound 2a

RT: 3.04 - 3.60 SM: 7B

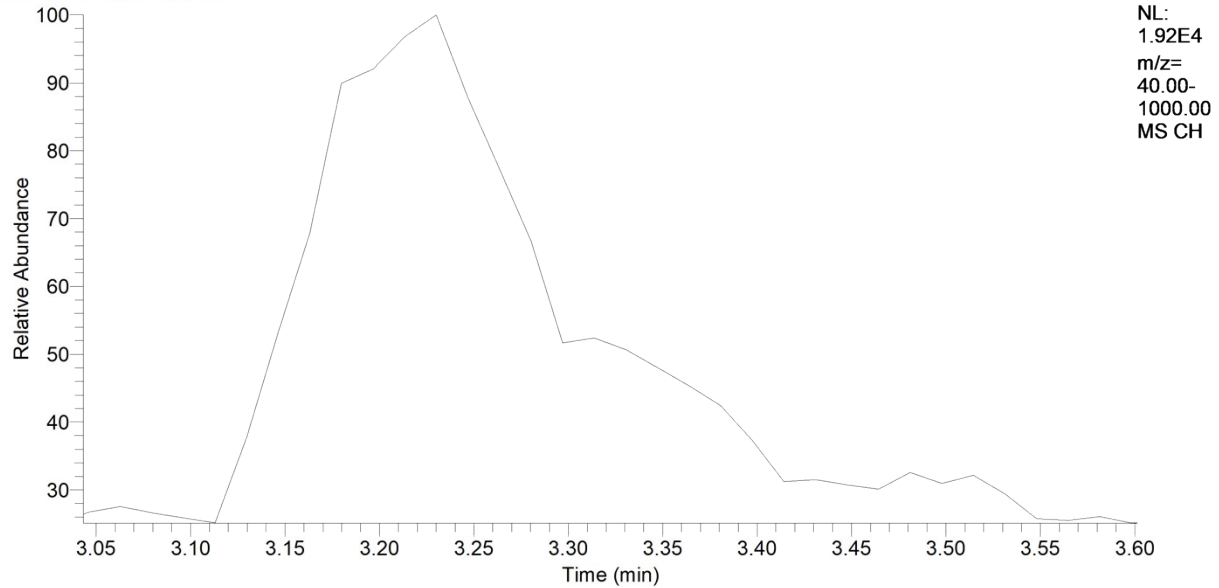

CH #89 RT: 1.51 P: + NL: 3.96E2  
T: {0,0} + c EI Full ms [40.00-1000.00]

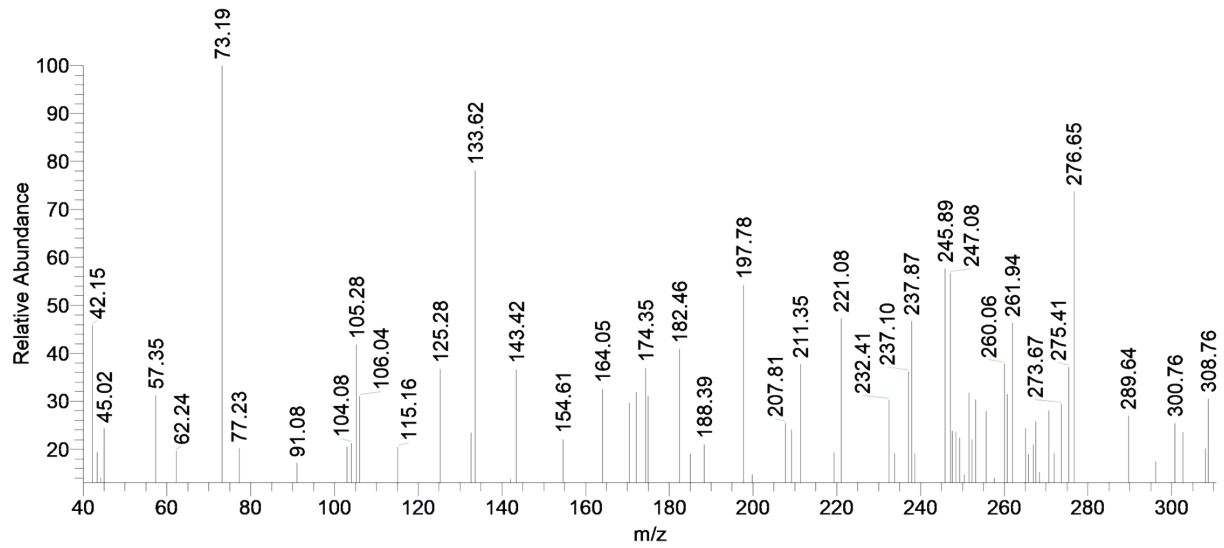

## Supplementary Information

Figure S25. Mass spectrum of compound 2b

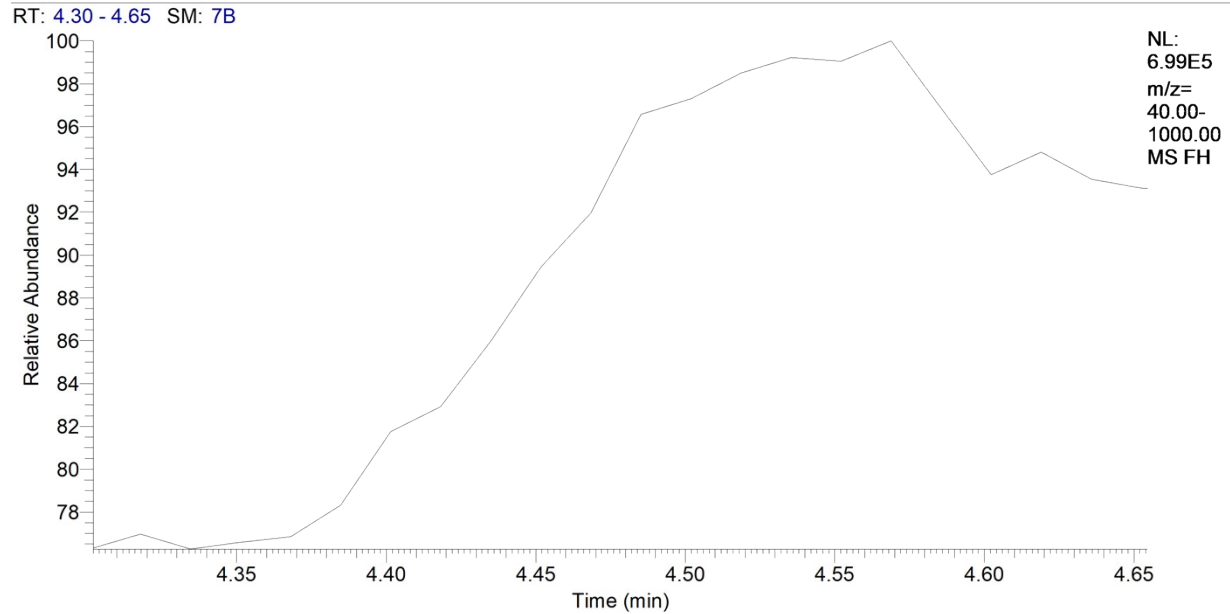

FH #141 RT: 2.38 P: + SB: 2 1.07, 1.21 NL: 1.81E3  
T: {0,0} + c EI Full ms [40.00-1000.00]

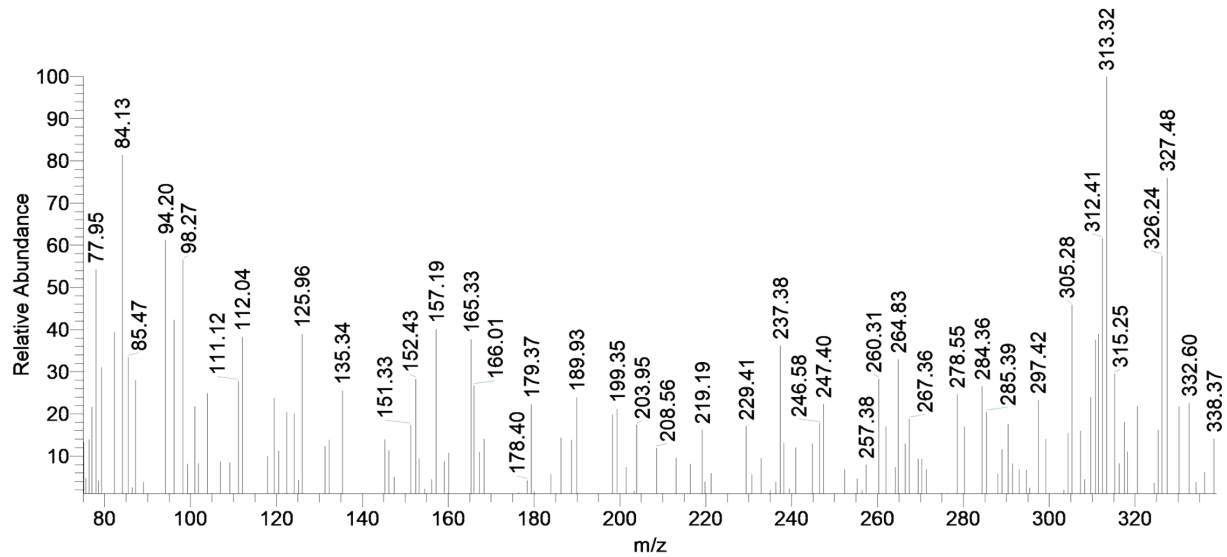

## Supplementary Information

Figure S26. Mass spectrum of compound 3a

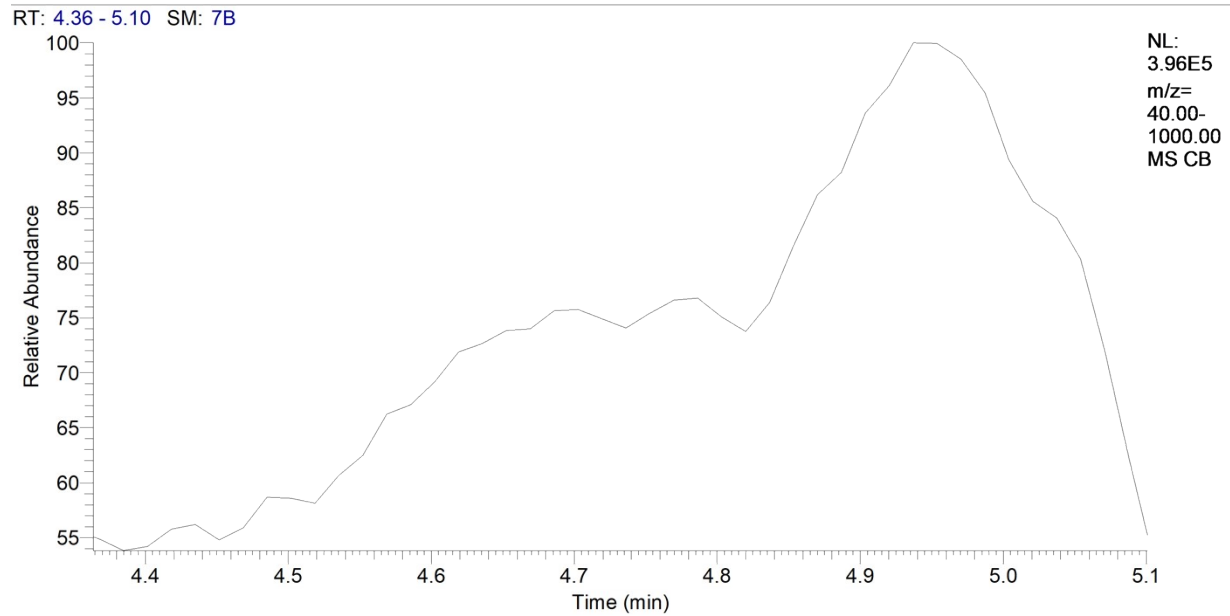

CB #157 RT: 2.64 P: + NL: 7.34E2  
T: {0,0} + c EI Full ms [40.00-1000.00]

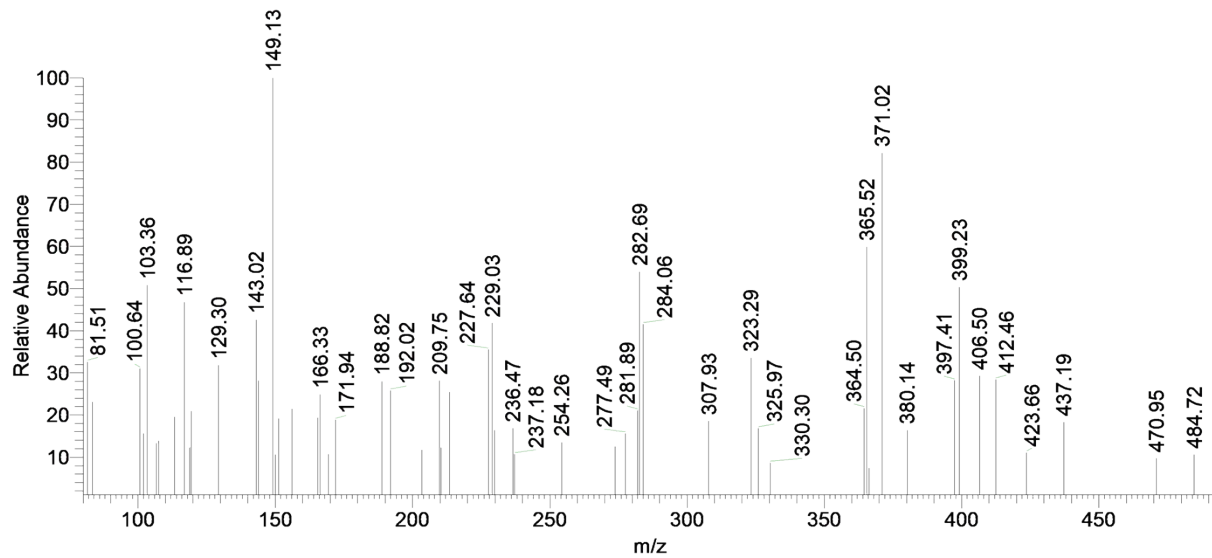

## Supplementary Information

Figure S27. Mass spectrum of compound 3b

RT: 0.87 - 1.22 SM: 7B

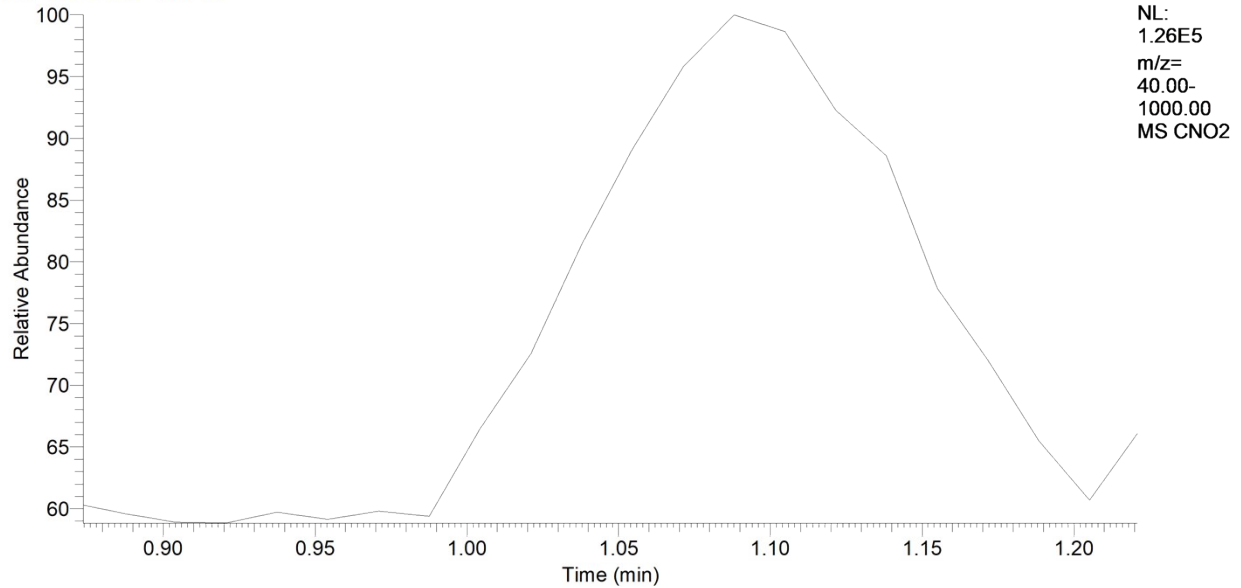

CNO2 #72 RT: 1.22 P: + NL: 3.15E2  
T: {0,0} + c EI Full ms [40.00-1000.00]

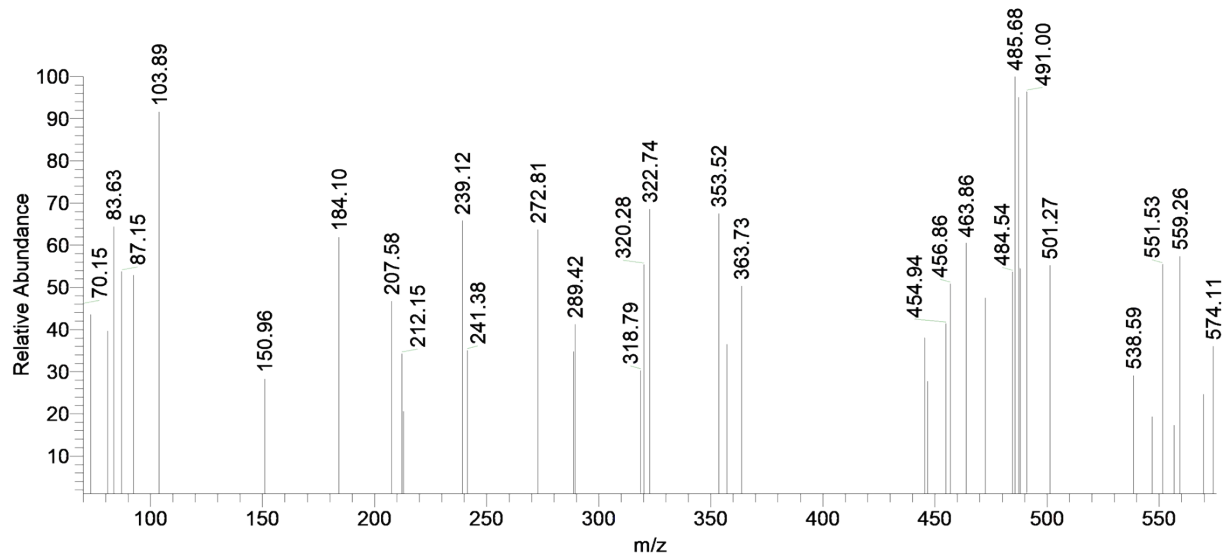

## Supplementary Information

Figure S28. Mass spectrum of compound 3c

RT: 0.95 - 3.20 SM: 7B

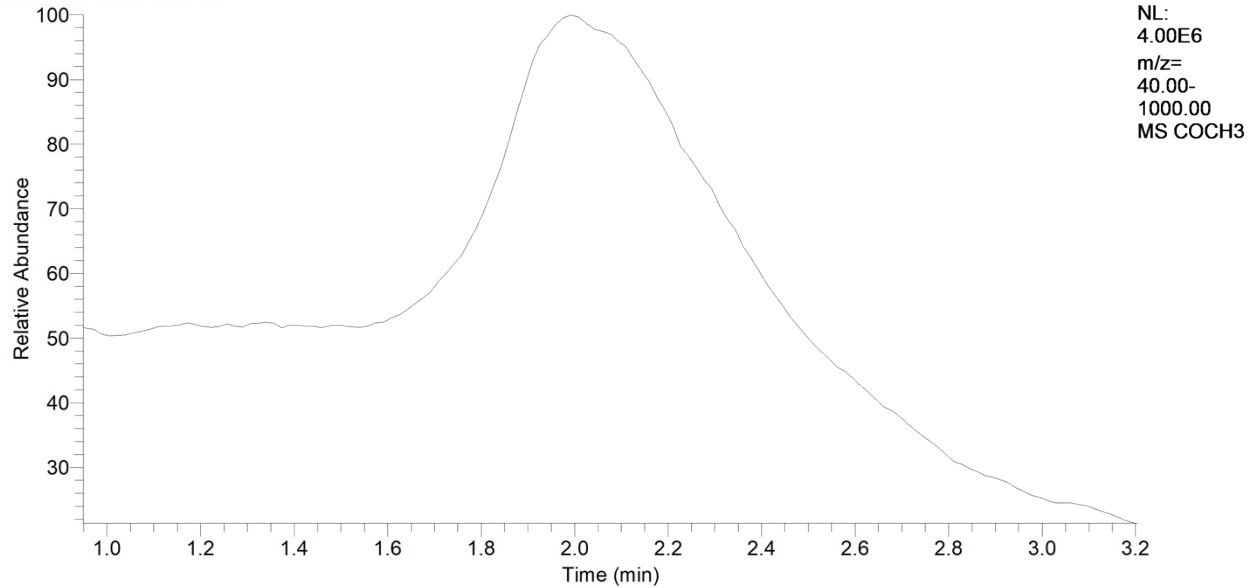

COCH3 #304 RT: 5.10 P: + SB: 18 4.17, 4.25-4.52 NL: 1.66E3  
T: {0,0} + c EI Full ms [40.00-1000.00]

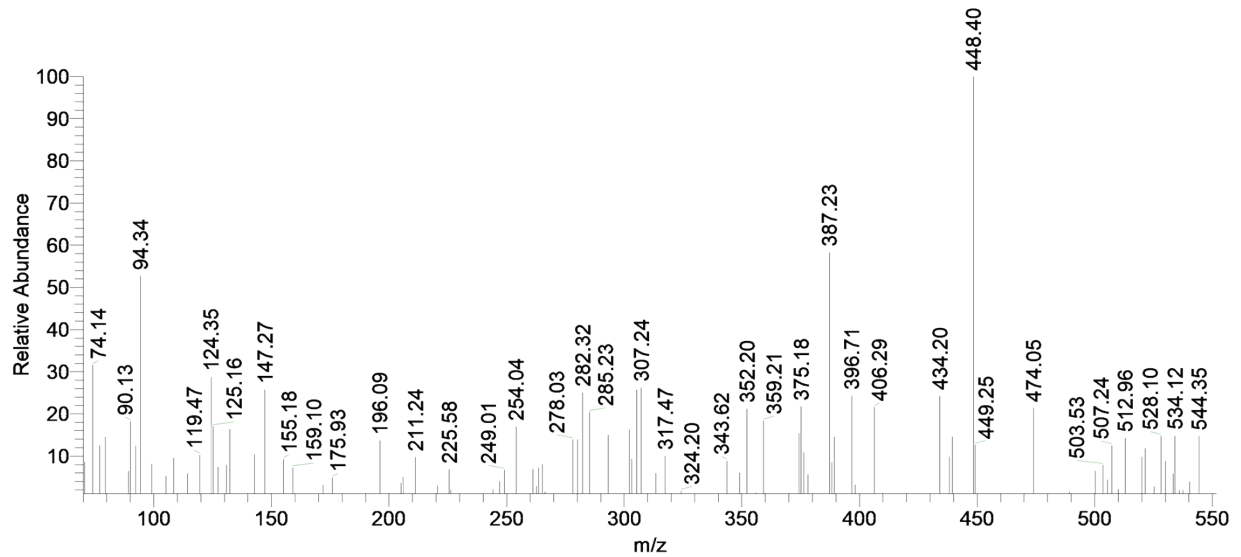

## Supplementary Information

Figure S29. Mass spectrum of compound 3d

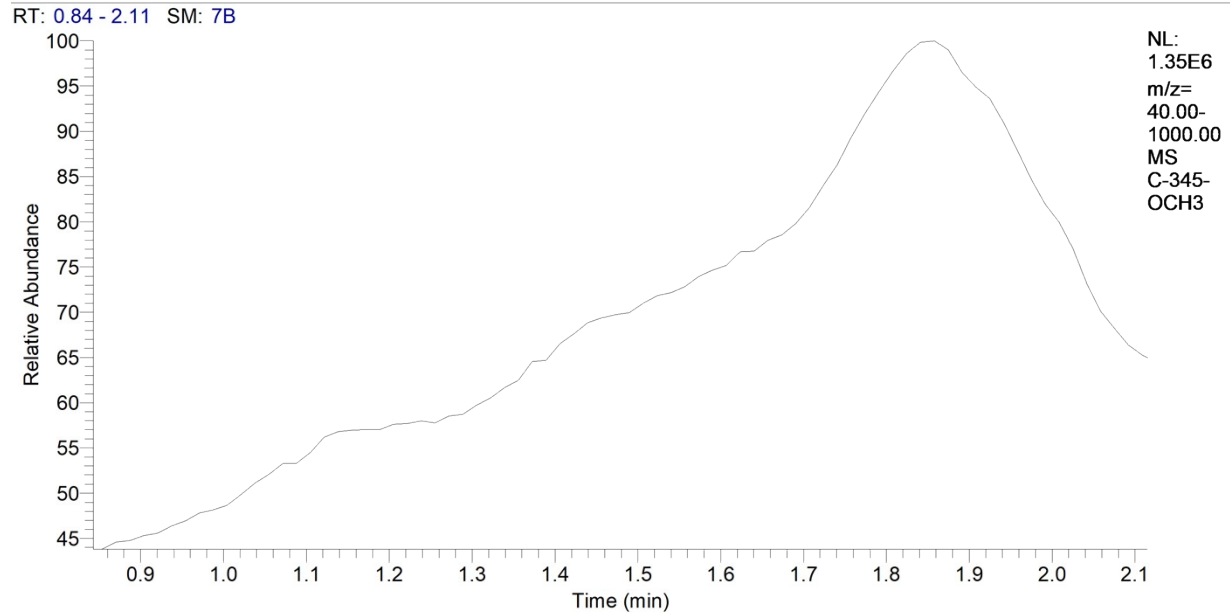

C-345-OCH3 #278 RT: 4.67 P: + SB: 2 5.09, 5.10 NL: 3.78E3  
T: {0,0} + c EI Full ms [40.00-1000.00]

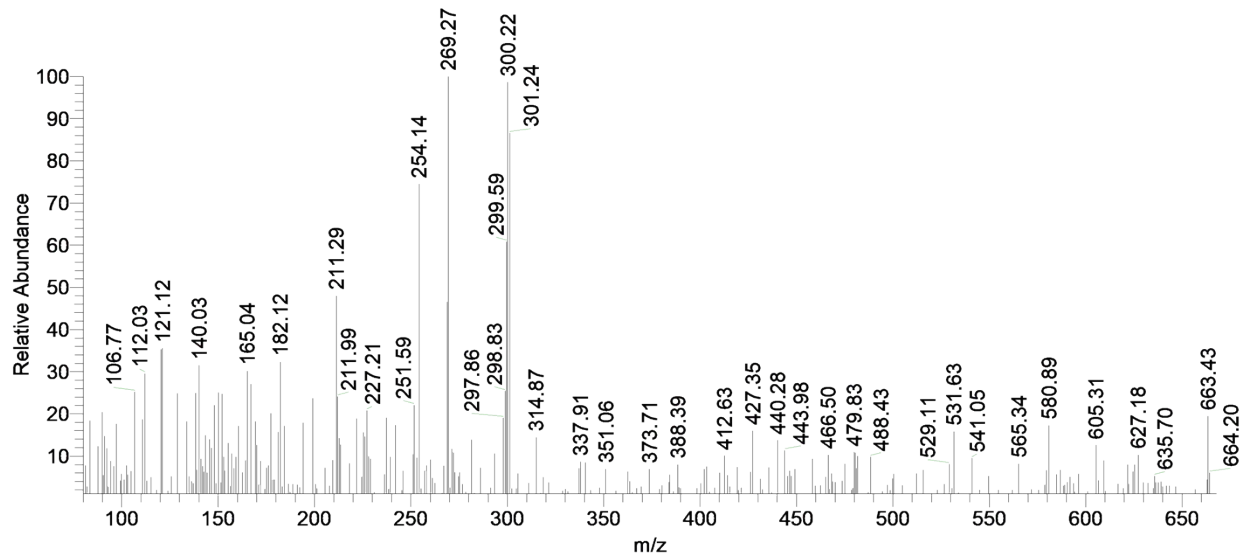

## Supplementary Information

Figure S30. Mass spectrum of compound 3e

RT: 2.25 - 3.52 SM: 7B

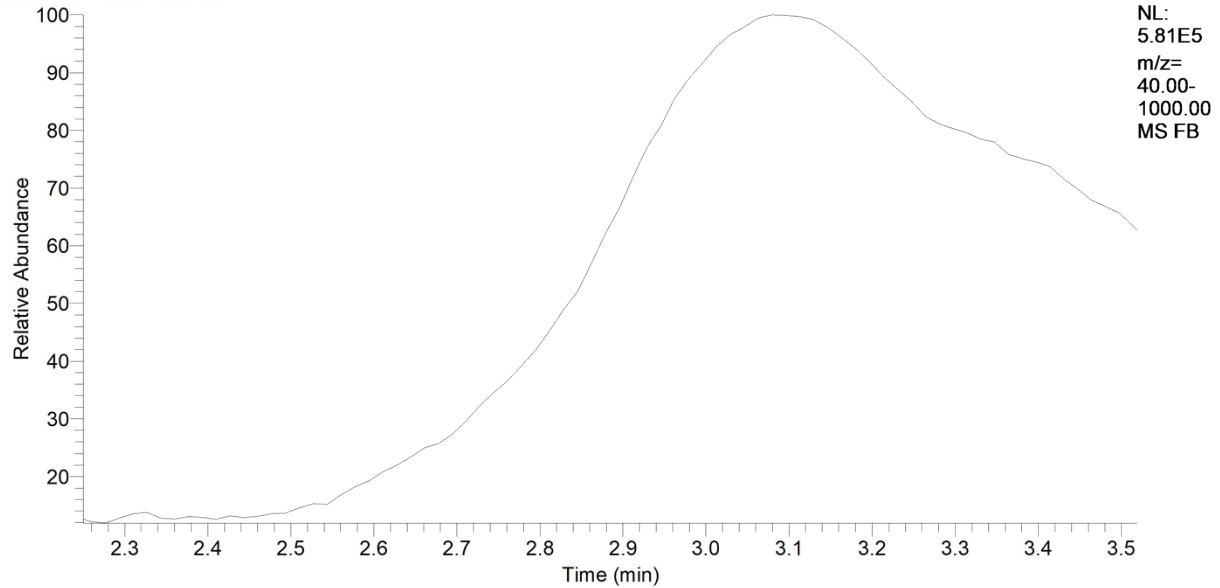

FB #100 RT: 1.69 P: + SB: 22 1.02-1.17, 0.94-1.12 NL: 1.21E3  
T: {0,0} + c EI Full ms [40.00-1000.00]

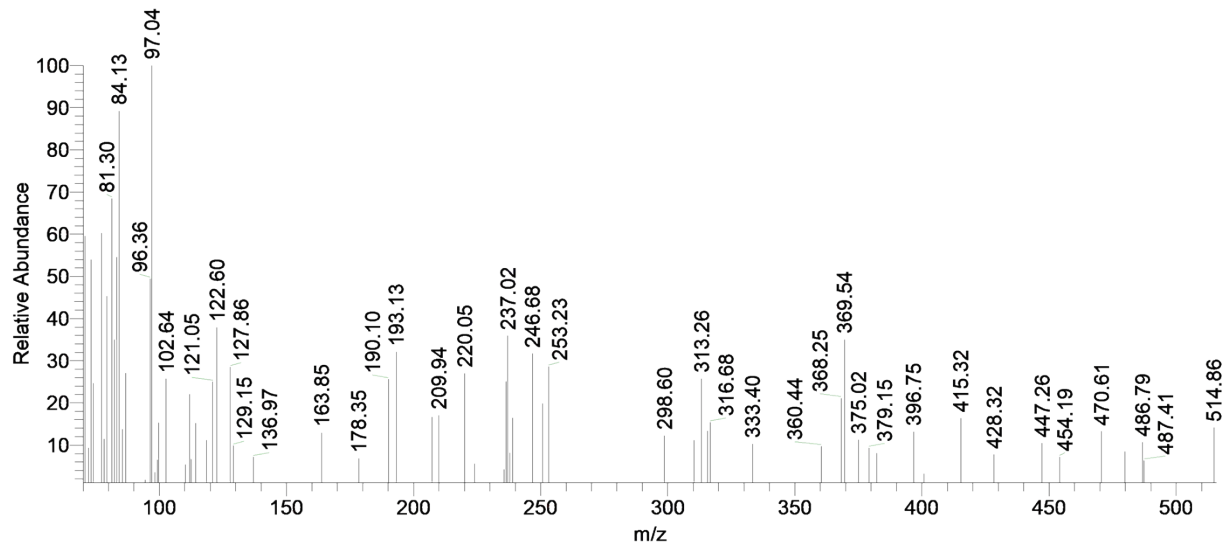

## Supplementary Information

Figure S31. Mass spectrum of compound 3f

RT: 2.05 - 2.53 SM: 7B

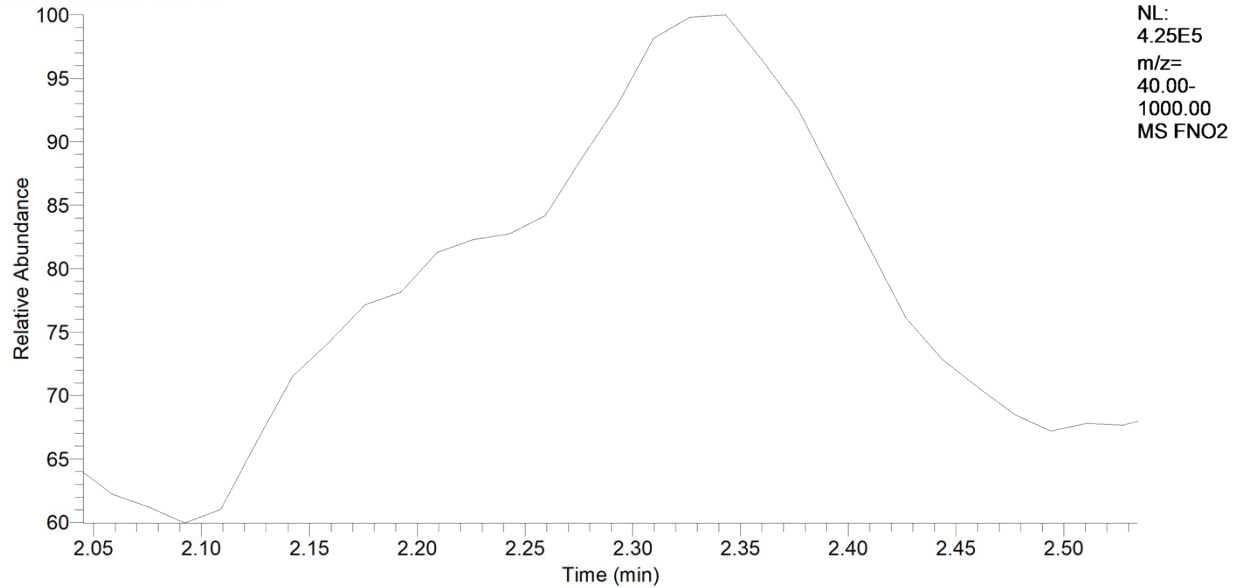

FNO2 #255 RT: 4.28 P: + SB: 2 4.28, 4.27 NL: 6.45E2  
T: {0,0} + c EI Full ms [40.00-1000.00]

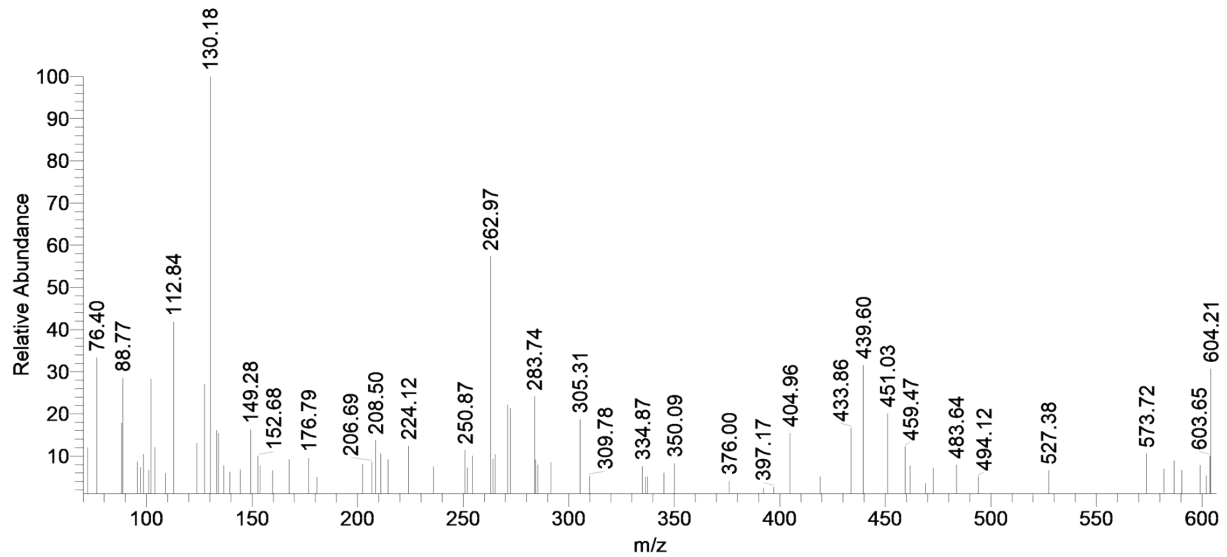

## Supplementary Information

Figure S32. Mass spectrum of compound 3h

RT: 0.47 - 2.84 SM: 7B

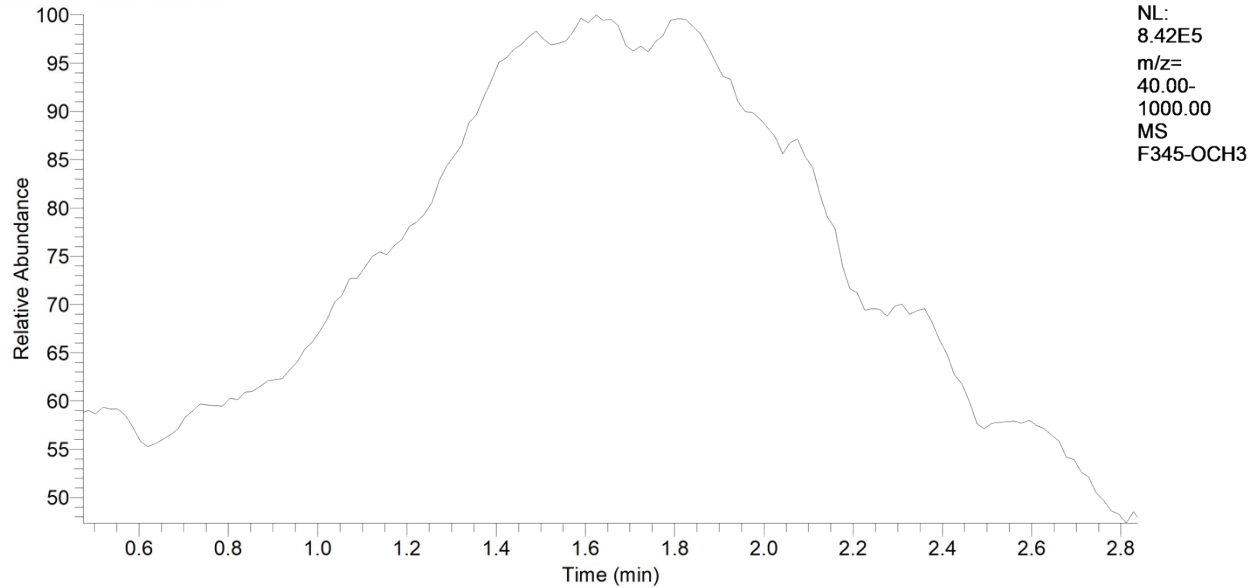

F345-OCH3 #304 RT: 5.10 P: + SB: 2 3.73, 3.73 NL: 2.10E3  
T: {0,0} + c EI Full ms [40.00-1000.00]

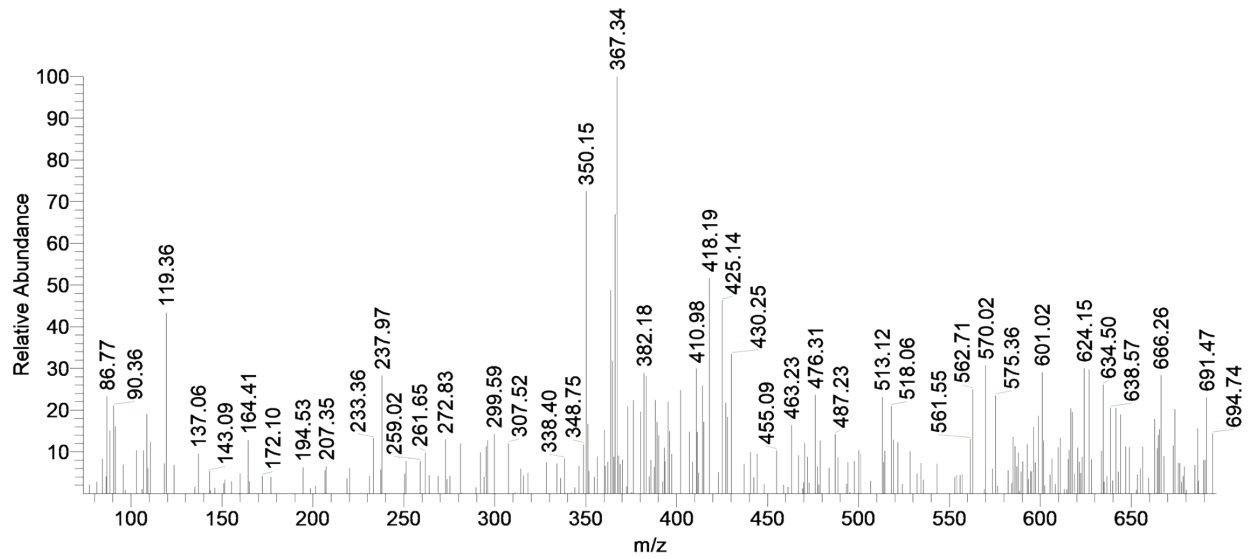

### Supplementary Information

Fig. S33. IC<sub>50</sub> curves (for MCF-7, HepG2 and A594) of the compounds 2a-b & 3a-h

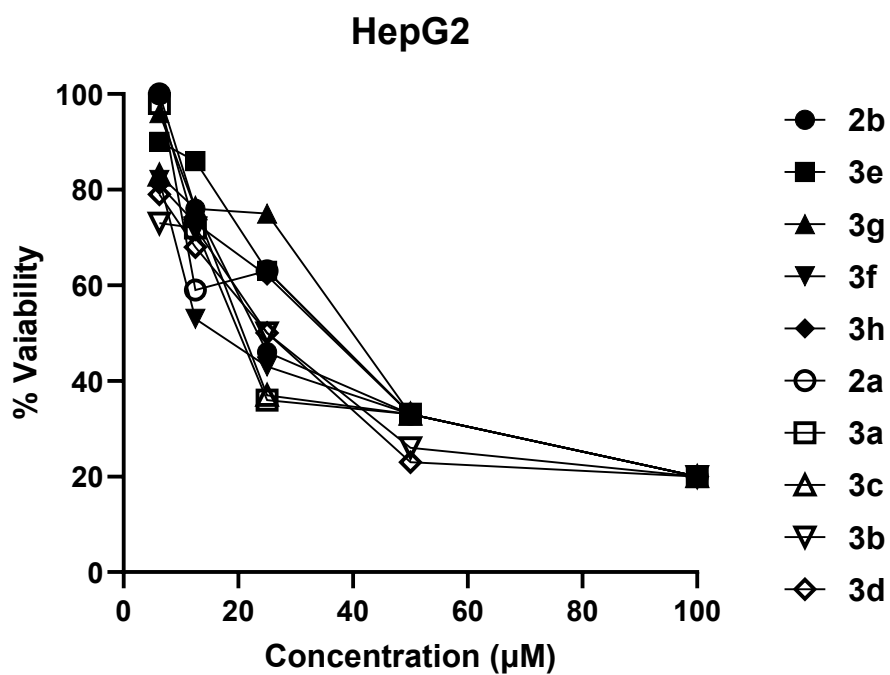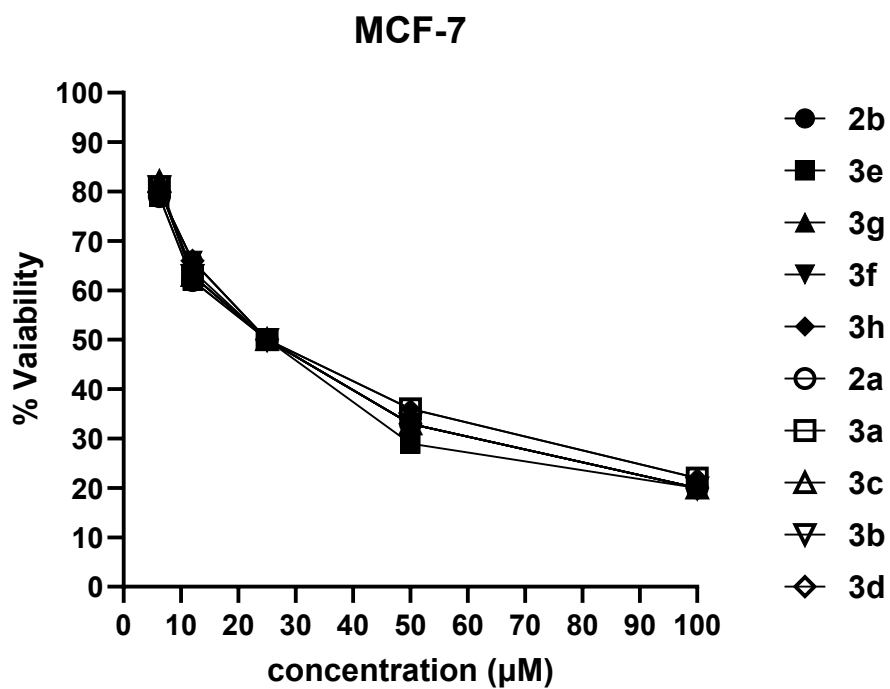

# Supplementary Information

## A549

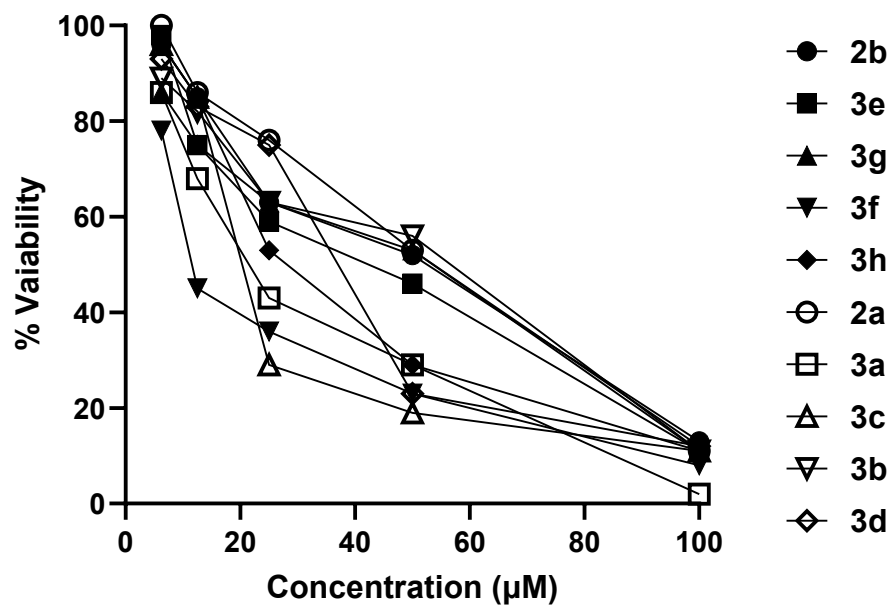

Supplement: d6ra01213b1.pdf [file d6ra01213b1.pdf]
